# Supplementary material for: Dietary Fiber and WHO Food Categories Extension for the Food-Pics_Extended Database
Source: Front Psychol. 2022 Jun 10;13:818471. doi: 10.3389/fpsyg.2022.818471 (PMC9226567; doi:10.3389/fpsyg.2022.818471)
Supplement: Supplementary file 1 [file Data_Sheet_1.xlsx]

## Sheet: food_pics_database_extended2016
Image_No	Item_description_english	Item_description_german	Item_description_german_unified	type	fibre_100g	protein_100g	fat_100g	carbs_100g	kcal_100g	quartiles_cal_per_100_gram	no_items_image	grams_total	fibre_total	protein_total	fat_total	carbs_total	Kcal_total	red	green	blue	object.size	brightness	contrast	complexity	norm_Complexity	spatial.frequencies	Recognizability	Familiarity	Valence	Arousal	Complexity	Palatability	Craving
1	cheesecake with cherry topping	Kaesekuchen mit Kirschen	Kaesekuchen mit Kirschen	5	0.753	6	17.14	32.89	311	3	1	150	1.129	9	25.71	49.335	466.5	0.422641	0.293784	0.283575	0.46547	42.7401	73.1786	0.0800741	0.172028	14.8791	98	97.4	58.1	42.5	35.7	67.2	39.6
2	Hamburger with bacon	Hamburger	Hamburger	10	1.25	15	15	14	252	3	1	360	4.5	54	54	50.4	907.2	0.500267	0.360084	0.139649	0.369807	43.7508	56.817	0.0943519	0.255138	15.3453	99.7	99.7	45.8	32.5	44.3	52.7	36.8
3	cheese burger, french fries and cola	Hamburger, Pommes, Cola	Hamburger, Pommes, Cola	10	1.46	5.34	9	20.3	185	2	3	720	10.512	38.448	64.8	146.16	1332	0.532752	0.321266	0.145982	0.302578	39.0663	62.3016	0.0984074	0.32523	15.6034	100	100	43.8	39.8	46.1	55.3	41
4	chocolate cookie	Choclate Cookie	Chocolate Cookie	4	1.933	6.2	26	63	510	4	1	19	0.367	1.178	4.94	11.97	96.9	0.454994	0.340523	0.204483	0.195748	19.1139	55.1568	0.060037	0.306706	15.2722	99.6	99.6	57.8	40.2	33.9	63.9	44.5
5	cookie mix	Kekse (diverse)	Plaetzchen 1	4	2.433	7.78	25.64	56.81	489	4	3	18	0.438	1.4004	4.6152	10.2258	88.02	0.471776	0.343963	0.184261	0.319889	31.9263	56.8756	0.102537	0.32054	15.7518	92.9	93.6	53.1	35.9	37.5	60.3	40.5
6	cheese cake with strawberries and crumbles	Kaesekuchen mit Erdbeeren, Streuseln	Kaesekuchen mit Streuseln und Erdbeeren	5	1.167	9.03	12.67	28.03	264	3	1	150	1.751	13.545	19.005	42.045	396	0.408145	0.322014	0.269841	0.276552	18.9838	52.7038	0.0718148	0.259679	15.4446	96.5	95.2	56	40.4	41.4	65.4	42.3
7	croissants	Croissants	Croissants	5	2.075	7.08	33.57	44.86	508	4	5	300	6.225	21.24	100.71	134.58	1524	0.503525	0.318563	0.177913	0.354381	39.4927	54.9145	0.158241	0.446527	15.8319	99.8	99.5	58.4	36	34.4	61.6	37.7
8	snack mix	Snackmix	Snackmix	9	3.433	9	0.5	75.3	347	3	40	20	0.687	1.8	0.1	15.06	69.4	0.48448	0.328569	0.18695	0.289526	34.6039	61.8478	0.115574	0.399184	15.5845	93.4	99.6	54.4	33.2	47.6	56.8	33.2
9	waffles	Waffeln	Waffel rund	5	1.04	9.09	24	57	470	4	1	42	0.437	3.8178	10.08	23.94	197.4	0.509226	0.324865	0.16591	0.283711	35.4892	48.1602	0.103648	0.36533	16.7591	99.6	100	63.5	44.9	32.9	72.1	49.9
10	Spaghetti with tomato sauce	Spaghetti mit Tomatensauce	Spaghetti mit Tomatensauce	10	1.867	3.34	6.73	16.05	139	2	1	250	4.668	8.35	16.825	40.125	347.5	0.425654	0.339535	0.234812	0.357993	26.8082	63.5614	0.0975	0.272352	15.4259	99.7	99.7	65.6	39.4	36.5	71.5	44.7
12	ham sandwich	Schinkensandwich	Schinkensandwich Toast	10	1.243	14.37	20.6	4.92	261.5	3	1	205	2.548	29.4585	42.23	10.086	536.075	0.429512	0.363656	0.206831	0.392952	46.6031	54.0421	0.144296	0.367211	15.153	98.4	98.9	49.4	34.7	49.4	51.3	34.7
13	Frankfurt crown cake	Frankfurter Kranz	Torte	5	1.5	4.88	24.05	32.31	363	4	1	2000	30	97.6	481	646.2	7260	0.455743	0.318605	0.225653	0.584796	59.7955	68.1483	0.239444	0.409449	17.258	99.7	98.3	56.7	40.2	55.5	62.2	41
14	muffin	Muffin	Muffins	5	1.133	5.4	20	50	404	4	1	89	1.008	4.806	17.8	44.5	359.56	0.485999	0.365889	0.148113	0.174322	17.7912	41.4591	0.0472222	0.27089	14.7761	99.5	100	51.9	32.5	21.8	56	31.2
15	croissants	Croissants	Croissants	5	2.3	6.4	40.4	40	442	4	4	200	4.6	12.8	80.8	80	884	0.486064	0.342897	0.171039	0.304233	28.8956	39.3636	0.089963	0.295704	14.8743	100	100	56.1	36.7	28.8	63.6	37.3
16	pancakes	Pancakes	Pfannkuchen	5	2.167	7.86	20	45	378	4	4	800	17.336	62.88	160	360	3024	0.545797	0.311673	0.14253	0.297296	37.6804	55.5808	0.0953333	0.320668	15.73	97.5	97.7	55.7	34.4	31	62.4	44.3
17	cheese burger, french fries and cola	Hamburger, Pommes, Cola	Hamburger, Pommes, Cola	10	1.46	5.34	9	20.3	185	2	3	720	10.512	38.448	64.8	146.16	1332	0.533772	0.32309	0.143137	0.497733	64.5021	61.5981	0.141463	0.284214	15.6548	99.7	99.7	44.6	37.3	48.9	54.8	37.5
18	German krapfen	Berliner/ Krapfen	Krapfen	5	1.533	6.67	13.33	41.67	317	3	1	60	0.92	4.002	7.998	25.002	190.2	0.449055	0.350575	0.200371	0.399878	40.6757	47.984	0.170074	0.425315	16.739	100	99.6	53.3	31.3	25.5	64.8	35.9
19	German krapfen	Krapfen	Krapfen	5	1.533	6.67	13.33	41.67	317	3	5	300	4.599	20.01	39.99	125.01	951	0.431595	0.332609	0.235795	0.308385	27.0595	43.1575	0.0945741	0.306675	16.0697	99.2	100	56.8	38.6	29.5	61.6	37.3
20	German krapfen	Krapfen	Krapfen	5	1.4	6.67	13.33	41.67	317	3	5	300	4.2	20.01	39.99	125.01	951	0.449407	0.33541	0.215183	0.465456	39.6367	49.574	0.114611	0.246234	16.5532	98.9	98.9	53.4	34.1	31.5	62.5	33.6
21	raspberry candies	Himbeerbonbons	Himbeerbonbons	4	0	0.05	0	97	388	4	16	80	0	0.04	0	77.6	310.4	0.499421	0.237341	0.263239	0.230615	23.1177	57.9199	0.105352	0.45683	16.8874	93.5	92.7	52	26.2	22.7	50.4	27
22	french fries	Pommes Frites	Pommes rot weiss	10	3.025	3.75	17.04	34.095	295	3	70	220	6.655	8.25	37.488	75.009	649	0.508438	0.36732	0.124242	0.367707	32.5422	47.3327	0.118019	0.320958	14.8717	100	99.3	49.6	33.6	31.5	57.6	32.5
23	ham sandwich	Schinkensandwich	Schinkensandwich Broetchen	10	1.71	14.67	20.26	6.28	265.13	3	1	200	3.42	29.34	40.52	12.56	530.26	0.474761	0.342799	0.18244	0.311963	36.7924	53.9765	0.0971852	0.311528	15.3324	99.5	100	45.1	32.1	46.6	46.2	30.2
24	ice cream sandwiches	Eiswaffeln	Eissandwich	4	0.8	1.5	4.8	15	109	2	4	400	3.2	6	19.2	60	436	0.434772	0.327852	0.237375	0.285211	25.3447	54.3231	0.13463	0.472035	15.0638	84.9	85.3	51.3	31.7	29.3	49.8	35.5
25	ice cream with chocolate beans	Eis mit Smarties	Eis	4	0.767	2.58	2.68	30.66	160	2	1	100	0.767	2.58	2.68	30.66	160	0.428835	0.297128	0.274037	0.434022	36.1987	66.8126	0.1175	0.270723	15.8099	98.7	98.1	55.8	43.7	46.7	64.2	44.3
26	chips	Chips	Chips	9	4.133	5.48	35	48	539	4	15	34	1.405	1.8632	11.9	16.32	183.26	0.50499	0.385094	0.109916	0.459981	35.9218	30.728	0.0932222	0.202665	13.6223	92	98.6	45	31.3	25.7	53.8	32.4
27	opened chips bag	Chips (Tuete)	Chips	9	4.133	5.48	39.4	40.6	535	4	1	200	8.266	10.96	78.8	81.2	1070	0.467912	0.362484	0.169604	0.318059	35.2007	54.6001	0.0797037	0.250594	15.3367	97.9	99.3	49.8	38.4	26.7	60.6	39.4
28	fruit cake	Obsttorte	Beerentortenstueck	5	0.267	4.02	1.88	30.58	157	2	1	150	0.4	6.03	2.82	45.87	235.5	0.437399	0.301924	0.260677	0.29867	31.9875	67.8022	0.0674815	0.22594	15.7769	97.4	96.6	54.7	40.2	51.5	60	36.4
29	cake (with gelatinized fruits)	Kuchen (mit gummibaerchen)	Gugelhupf mit kandierten Fruechten	5	1.933	6.41	16.85	42.52	349	3	1	500	9.665	32.05	84.25	212.6	1745	0.469138	0.353438	0.177424	0.471841	53.8604	55.2729	0.143426	0.303971	17.6462	95.5	94.4	45.4	28.7	33.2	46.3	30.4
30	french fries, chicken	Pommes,Haehnchen	Pommes,Huehnchen	10	1.923	17.29	8.14	3.7	156.67	2	1	900	17.307	155.61	73.26	33.3	1410.03	0.498126	0.340919	0.160955	0.375589	39.5445	48.3937	0.109519	0.291591	15.9382	99.6	98.8	44.5	31.2	36.4	50.1	27.9
31	cookies (mixed)	Kekse (diverse)	Plaetzchen 2	4	1	7.78	25.64	56.81	489	4	4	24	0.24	1.8672	6.1536	13.6344	117.36	0.44454	0.338497	0.216963	0.171189	16.3899	62.9589	0.0584259	0.341295	15.642	97	95.9	52.4	31.1	34	58.2	30.9
32	pizza (with mushrooms)	Pizza (Pilze)	Pizza Champignons	10	1.55	6.55	5.64	21.27	165.45	2	1	550	8.525	36.025	31.02	116.985	909.975	0.541479	0.304007	0.154514	0.531033	72.9928	61.0455	0.188241	0.35448	17.0199	100	100	59.3	40.9	39	67	41.5
33	spaghetti with tomato sauce	Spaghetti mit Tomatensauce	Spaghetti mit Tomatensauce	10	1.867	3.34	6.73	16.05	139	2	1	250	4.668	8.35	16.825	40.125	347.5	0.401499	0.345331	0.25317	0.456367	29.0236	61.6963	0.0814074	0.178382	15.4887	100	100	61.8	37.3	35	70.6	45.3
34	ham and cheese sandwich	Schinkensandwich	Schinkensandwich langes Broetchen	10	1.277	19.68	34.84	3.55	201.76	3	1	380	4.853	74.784	132.392	13.49	766.688	0.467069	0.327569	0.205362	0.310619	34.4924	55.4392	0.11837	0.38108	15.246	96.9	100	44.2	29.5	41.6	47	29.2
35	Raffaelo (coconut wafer balls)	Raffaelo	Raffaelo	4	3.8	9	48	37	620	4	7	70	2.66	6.3	33.6	25.9	434	0.407539	0.348685	0.243776	0.244448	21.7315	42.7108	0.0895741	0.366434	15.0167	59.5	61.6	47.1	31.4	34.5	47.4	28.4
36	some different cake wedges	diverse Torten	Kuchen/Tortenstuecke	5	1.367	5.03	16.34	29.63	285.6	3	6	900	12.303	45.27	147.06	266.67	2570.4	0.401934	0.345744	0.252322	0.280696	32.6315	60.4332	0.0893704	0.318388	16.0392	93.1	99.9	65	45.2	60.9	70.8	47.1
37	pasta meal	Nudelgericht	Nudelgericht	10	2.173	5.39	3.97	18.71	133	2	1	250	5.433	13.475	9.925	46.775	332.5	0.548693	0.296644	0.154663	0.364774	45.9818	66.7017	0.129556	0.355167	17.0431	91.5	94.2	57.6	34.6	49	61.6	35.9
38	chocolate and strawberry ice cream	Schoko-/Erdbeereis	Schoko-/Erdbeereis	4	1.3	4.43	9.6	21.72	191	2	2	120	1.56	5.316	11.52	26.064	229.2	0.498991	0.33103	0.169979	0.213159	28.0926	70.499	0.0745185	0.349591	16.2277	88.5	95.1	61.6	40	43.5	67.3	45.5
39	cake with tangerines	Mandarinenkuchen	Mandarinenkuchen	5	1.163	4.02	1.88	30.58	157	2	1	150	1.745	6.03	2.82	45.87	235.5	0.468196	0.352284	0.17952	0.236748	21.2382	48.9929	0.0649815	0.274475	14.9726	80.3	91.2	54.1	36.8	39.3	56	37.6
40	pastries	diverses Gebaeck(Croissants)	Croissants	5	2.567	5.54	23.3	38.95	388	4	10	1100	28.237	60.94	256.3	428.45	4268	0.469752	0.313138	0.21711	0.452019	49.9979	70.9061	0.145685	0.322299	17.3817	99.3	100	56.9	33.1	46.1	67.3	37
41	Donut with chocolate sprinkles	Donut (Schokostreusel)	Donut Schoko weiss	5	1.7	7.82	23	42	454	4	1	50	0.85	3.91	11.5	21	227	0.438206	0.327056	0.234738	0.443063	55.8001	63.3758	0.142352	0.32129	16.7656	100	97.6	48	28.8	27.2	55.5	34.2
42	chocolate cake with nuts	Schokonusskuchen	Schokonusskuchen	5	1.567	6.88	18.31	40.96	359	4	1	800	12.536	55.04	146.48	327.68	2872	0.43674	0.292549	0.27071	0.265396	29.8851	62.6741	0.0568519	0.214215	16.4607	95.1	92.3	56.8	39.4	40.6	64.4	38.9
43	chips	Chips	Chips	9	4.133	5.48	39.4	40.6	535	4	9	20	0.827	1.096	7.88	8.12	107	0.49293	0.39816	0.108909	0.467122	30.2311	24.097	0.0949259	0.203214	13.8763	90.5	98.8	51.3	33.4	24.8	58.2	37.7
44	cookie (filled with jelly)	Keks	Plaetzchen doppelt und gefuellt	4	1.067	7.78	25.64	56.81	489	4	1	6	0.064	0.4668	1.5384	3.4086	29.34	0.424278	0.322726	0.252995	0.25703	17.8832	64.4251	0.0503148	0.195755	15.7891	97.7	97.9	51.9	33.2	32.6	58	35.6
45	Hamburger	Hamburger	Hamburger	10	1.167	10.39	9.95	25.01	232	3	1	250	2.918	25.975	24.875	62.525	580	0.471369	0.351096	0.177536	0.485726	60.4542	63.4399	0.120926	0.248959	15.4808	98.2	100	42.5	30	38.6	47.6	26.8
46	french fries	Pommes Frites	Pommes Frites	10	3.65	4	14.67	36	290	3	40	150	5.475	6	22.005	54	435	0.471901	0.36226	0.16584	0.340441	29.8817	48.4964	0.135241	0.397252	14.898	99.6	99.6	48.4	35.1	26.5	54.9	37
47	french fries and chicken drumsticks	Pommes,Haehnchenkeule	Pommes,Huehnchen	10	1.517	15.6	10.4	9.8	198	3	2	600	9.102	93.6	62.4	58.8	1188	0.512733	0.34508	0.142187	0.356404	36.5996	50.2889	0.135852	0.381174	15.8556	92.1	98.9	43.8	32.1	44.6	53.2	32.7
48	chocolate muffin	Schokomuffin	Schokomuffins	5	2.393	7.84	11.56	37.31	286	3	4	320	7.658	25.088	36.992	119.392	915.2	0.462052	0.345687	0.19226	0.466041	45.3314	47.9849	0.105519	0.226415	15.9844	99.2	100	57.6	41.7	29.1	63.8	42.5
49	chocolate popsicles	3 schokoEis am Stiel	Eis am Stiel	4	0	3.5	19	29	300	3	3	240	0	8.4	45.6	69.6	720	0.657088	0.214801	0.128111	0.245985	42.1884	75.1237	0.0463333	0.188358	14.6501	100	99.4	55.4	37	25.4	66.9	39.7
50	donuts and pastries	diverses Gebaeck (Donuts)	Gebaeck	5	1.77	6.14	16.02	27.76	338.11	3	9	750	13.275	46.05	120.15	208.2	2535.82	0.456117	0.330687	0.213197	0.461474	47.9129	52.8206	0.171444	0.371515	16.8828	98.8	100	51.6	38.2	48.7	58.8	41.8
51	cake with powdered sugar	Kuchen	Gugelhupf Schoko	5	2.2	6.41	16.85	42.52	349	4	1	500	11	32.05	84.25	212.6	1745	0.417699	0.347393	0.234908	0.427726	37.7495	47.4378	0.155796	0.364243	16.6453	96.6	95.2	55.6	32	32.3	63	35.8
52	hot dog	Hotdog	Hot Dog	10	1.6	9.198	9.89	26.293	232	3	1	115	1.84	10.5777	11.3735	30.237	266.8	0.562693	0.32519	0.112117	0.388119	51.6401	58.0686	0.118463	0.305224	14.8695	99.6	100	41.1	34.4	26.5	40.8	30.8
53	hot dog	Hotdog	Hot Dog	10	1.733	9.198	9.89	26.293	232	3	1	115	1.993	10.5777	11.3735	30.237	266.8	0.49758	0.333739	0.168681	0.399481	41.9393	55.1014	0.102778	0.257278	15.032	97.8	100	42.6	28.6	24.2	44.7	30.6
54	cheese platter	Kaeseplatte	Kaese mit Obst	1	0.61	28.7	30	0	383	4	1	500	3.05	143.5	150	0	1915	0.431766	0.350012	0.218222	0.428207	36.7399	48.4109	0.0952963	0.222547	15.3265	99.1	97.1	57.9	37.3	30.1	63.7	40.7
55	raspberry cake	Himbeer-Torte	Himbeercremetorte	5	0.6	3.1	10.6	28.2	227	3	1	1100	6.6	34.1	116.6	310.2	2497	0.59841	0.22806	0.173531	0.497574	70.3968	67.31	0.118963	0.239086	16.6919	98.7	96.1	51.8	39.3	48.2	56.6	37.4
56	chocolate and vanilla ice cream	Schoko-/Vanilleeis	Schoko-/Vanilleeis	4	0.6	4	10.67	26.67	220	3	2	150	0.9	6	16.005	40.005	330	0.473682	0.30116	0.225158	0.258915	31.3495	69.3476	0.094963	0.366773	16.4071	96.2	97.9	63.7	36.5	27.9	68.3	43.1
57	ham sandwich with chips	Schinkensandwich mit Chips	Schinkensandwich mit Chips	10	1.755	13.86	17.78	18.73	299	3	2	210	3.685	29.106	37.338	39.333	627.9	0.435706	0.363887	0.200407	0.401619	43.3479	65.1454	0.127963	0.318618	14.5776	98.7	98.6	47.9	36.7	48.6	53.9	38
58	ham sandwich	Schinkensandwich	Schinkensandwich langes Broetchen	10	1.61	8.19	5.17	19.4	155	2	1	232	3.735	19.0008	11.9944	45.008	359.6	0.490367	0.356427	0.153206	0.276915	31.7017	57.1619	0.0838519	0.302807	15.3041	96.9	97.4	48	26.2	45.9	51.3	31.4
59	apple pie	Apfelkuchen	Apfelkuchen	5	1.925	2.9	7.8	37.4	237	3	1	1200	23.1	34.8	93.6	448.8	2844	0.46562	0.335467	0.198913	0.405993	53.9568	56.9282	0.12837	0.316189	17.3797	78.8	77.7	51.8	32.4	45.1	55.9	31.8
60	french fries	Pommes Frites	Pommes rot weiss	10	2.6	3.75	17.04	34.095	295	3	33	220	5.72	8.25	37.488	75.009	649	0.491213	0.345393	0.163394	0.324926	34.4462	46.1746	0.10637	0.327368	15.0363	98.7	99.5	55.1	41.2	31.6	68	46.2
61	pizza (salami)	Pizza (salami)	Pizza Salami	10	2.1	6.55	5.64	21.27	165.45	2	1	550	11.55	36.025	31.02	116.985	909.975	0.596851	0.253729	0.14942	0.340526	54.7143	55.9926	0.113481	0.333254	16.8572	100	100	50.8	31.4	30.9	58.2	37.2
62	challah (braided yeast bun)	Hefezopf	Hefezopf Hagelzucker	5	2.083	8.85	3	51.9	270	3	1	70	1.458	6.195	2.1	36.33	189	0.53305	0.321058	0.145892	0.254048	33.1879	59.25	0.0974815	0.383713	15.8632	94.2	96.4	57	37	32	64	44.7
63	pretzels	Brezeln	Salzbrezeln	9	4.433	13.1	7.5	68	392	4	10	40	1.773	5.24	3	27.2	156.8	0.453104	0.319571	0.227325	0.237815	26.4335	58.6835	0.0902037	0.379302	15.54	93.6	99.6	48	22.4	32.2	46.1	21.5
64	butter	Butter	Butter	1	0	1	83.2	0.6	741	4	1	5	0	0.05	4.16	0.03	37.05	0.372369	0.429432	0.198198	0.255204	22.1016	69.797	0.0345556	0.135404	15.7403	75.6	76.6	51.1	25.1	27.4	42.1	20.7
65	cheese burger	Cheeseburger	Cheeseburger	10	1.033	12	12	14	217	3	1	350	3.615	42	42	49	759.5	0.477118	0.367745	0.155138	0.381122	43.4723	63.1926	0.0960741	0.252082	15.6125	100	100	46.1	35	36.7	50.3	34.2
66	croissants	Croissants	Croissants	5	1.733	5.2	18.8	35.9	333	3	2	150	2.599	7.8	28.2	53.85	499.5	0.53899	0.336145	0.124865	0.390137	46.506	51.0736	0.105519	0.270465	15.3603	98.3	100	57	33.6	30.2	62.4	34.4
67	ice cream	Eis	Eis	4	0.775	3	5	30	220	3	2	150	1.163	4.5	7.5	45	330	0.434748	0.353354	0.211898	0.316678	34.194	48.8608	0.0577593	0.182391	15.6343	94.9	94.7	54.1	34.4	38.9	60	34.9
68	doner kebab	Doener	Doener	10	1.69	12.11	4.91	24.31	192	2	1	350	5.915	42.385	17.185	85.085	672	0.517957	0.312037	0.170006	0.366859	47.748	62.1637	0.124815	0.340225	16.355	87.3	93	49.3	36.1	43.7	52.7	30.5
69	fish sandwich	Fischbroetchen	Fischbroetchen	10	1.7	9.78	8.27	29.13	230	3	1	200	3.4	19.56	16.54	58.26	460	0.523424	0.348535	0.128041	0.326974	37.4775	56.2604	0.0773333	0.236512	15.264	84.3	90.2	44.2	29.2	44.6	44.8	24.9
70	cheese	Kaese	Hartkaese Stueck	1	0	25	27	2	351	4	1	150	0	37.5	40.5	3	526.5	0.440548	0.362321	0.197131	0.190848	17.1919	27.561	0.0213889	0.112073	14.1563	97	95.6	53.2	26.8	25.7	59.4	27.5
71	cheese platter	Kaeseplatte	Kaese mit Obst	1	0.267	26	29.2	0	365	4	5	600	1.602	156	175.2	0	2190	0.433321	0.372782	0.193897	0.297015	23.8786	40.5126	0.0759444	0.255692	14.9354	97.9	99.8	53.4	34.1	33.4	60.7	34.6
72	sandwich roastbeef	Sandwich roastbeef	Sandwich roastbeef	10	1.35	9.47	7	17.7	173	2	1	243	3.28	23.0121	17.01	43.011	420.39	0.496422	0.328599	0.174978	0.322393	41.6396	55.1372	0.123259	0.382327	15.5692	87.4	95	43.2	35.5	41.3	45.4	32.9
73	Spaghetti Bolognese	Spaghetti Bolognese	Spaghetti mit Tomatensauce	10	1.95	6	4.08	15.3	121	2	1	400	7.8	24	16.32	61.2	484	0.42968	0.340991	0.229329	0.337	24.4619	60.336	0.104556	0.310254	15.7837	100	97.7	61.1	40.9	32.4	69.3	40.3
74	chocolate cake	Schokotorte	Schwarzwaelder Kirschtorte	5	1	3.9	12.1	32.3	256	3	1	1300	13	50.7	157.3	419.9	3328	0.417546	0.307504	0.27495	0.39077	54.9631	69.8894	0.112889	0.288888	16.2931	100	99.8	60.4	49.8	49.9	66.1	45.6
75	ham sandwich	Schinkensandwich	Schinkensandwich langes Broetchen	10	1.3	7.92	5	19.16	150	2	1	240	3.12	19.008	12	45.984	360	0.519251	0.321626	0.159124	0.318059	40.4534	50.3361	0.0749074	0.235514	14.9514	94.6	98.4	42.8	27.6	43	45.2	28.8
76	spaghetti with tomato sauce	Spagetti mit Tomatensauce	Spaghetti mit Tomatensauce	10	1.95	4.1	2.3	20.5	121	2	1	350	6.825	14.35	8.05	71.75	423.5	0.420432	0.333972	0.245596	0.339126	24.2799	55.71	0.114963	0.338998	15.6814	100	99.8	65.7	43.3	33.5	66.9	41
77	ham sandwich with chips	Schinkensandwich mit Chips	Schinkensandwich mit Chips	10	2.003	7.89	8.95	23.35	205	3	30	266	5.328	20.9874	23.807	62.111	545.3	0.460309	0.367729	0.171962	0.239478	23.6424	52.6892	0.0687037	0.28689	14.9103	91.5	97.7	50.8	31.1	52	49.3	32.4
78	muffins	Muffins	Muffins	5	0.9	8	11.56	37.3	286	3	5	350	3.15	28	40.46	130.55	1001	0.473312	0.327813	0.198875	0.310211	31.8931	60.9375	0.094	0.303019	15.7398	98.2	99.1	54.6	35.6	33	62.6	37.6
79	chocolate cookie	Schokokeks	Schokokeks	4	2.26	6.1	21	68	491	4	1	24	0.542	1.464	5.04	16.32	117.84	0.491265	0.29525	0.213485	0.250407	39.8998	63.7095	0.0764815	0.305428	16.9106	73.5	86.8	52.4	36.5	40.6	61.6	31.8
80	chocolate muffin	Schokomuffin	Schokomuffins	5	1.1	8	11.56	37.3	286	3	1	120	1.32	9.6	13.872	44.76	343.2	0.49607	0.347892	0.156037	0.209507	22.0613	44.4201	0.0487778	0.232821	15.349	100	99.3	52.5	30.2	33	62.5	40.1
81	pizza slices (assorted)	Pizza (diverse)	Pizza Quattro Staggioni	10	2.25	6.55	5.64	21.27	165.45	2	1	550	12.375	36.025	31.02	116.985	909.975	0.484169	0.341698	0.174134	0.399567	39.6348	49.5184	0.161389	0.40391	16.7646	95.6	97.6	51.8	38.5	49.6	58.2	33.8
82	cheese platter	Kaeseplatte	Kaese mit Obst 2	1	0.46	24	29	0.05	357	4	6	800	3.68	192	232	0.4	2856	0.413372	0.354994	0.231634	0.4641	38.63	50.3369	0.1125	0.242405	16.2735	100	100	62.8	39	43.9	68.9	43.5
83	filled chocolates	Schokopralinen	Pralinen	4	2.2	10	32.5	42.5	502	4	6	60	1.32	6	19.5	25.5	301.2	0.490446	0.289613	0.219941	0.262389	41.037	67.7391	0.0743333	0.283295	15.5297	91.7	95.4	60.1	41.8	46	64.8	40.9
84	cake	Kuchen	Gugelhupf Zitrone	5	0.667	5.9	21	52	428	4	1	450	3.002	26.55	94.5	234	1926	0.405183	0.352029	0.242788	0.342956	29.1405	37.8453	0.0787222	0.229541	15.3642	99.1	98	53.1	33.4	32.6	59.6	34.9
85	Pizza (with salami)	Pizza (Salami)	Pizza Salami	10	2.033	6.55	5.64	21.27	165.45	2	1	550	11.181	36.025	31.02	116.985	909.975	0.516139	0.301513	0.182348	0.33693	44.4764	46.27	0.104556	0.310319	16.7873	100	100	52.7	37.1	33.9	59.5	40.1
86	cheese burger, french fries	Cheeseburger, Pommes	Cheeseburger, Pommes	10	1.59	10.6	12.52	17.83	228	3	15	286	4.547	30.316	35.8072	50.9938	652.08	0.527596	0.34086	0.131543	0.286489	31.8536	53.9718	0.0938889	0.327723	15.0447	100	100	46.2	35.8	39.7	51.9	32.1
87	cheese burger	Cheeseburger	Cheeseburger	10	1	12	12	14	214	3	1	236	2.36	28.32	28.32	33.04	505.04	0.486321	0.346106	0.167573	0.38073	43.9748	57.9838	0.134648	0.353658	15.9938	100	99.5	41.7	27.3	34	46.9	27.5
88	stracciatella cake	Stracciatellatorte	Stracciatellatorte	5	0.833	3.1	21.2	28.8	320	3	2	90	0.75	2.79	19.08	25.92	288	0.434525	0.309869	0.255606	0.392015	41.2265	67.4576	0.0918704	0.234354	16.2633	87.6	82.1	54.7	37.7	47.9	56	39.6
89	strawberry cake	Erdbeertorte	Erdbeerkuchenstueck	5	0.667	3.8	11.2	29.3	236	3	1	175	1.167	6.65	19.6	51.275	413	0.572008	0.269198	0.158794	0.386752	46.3557	62.9229	0.107407	0.277717	16.4633	97.5	100	63.5	47.7	45.6	67.9	44.3
90	muffins	Muffins	Blaubeermuffins	5	1.033	5	22	43	393	4	4	360	3.719	18	79.2	154.8	1414.8	0.433016	0.34455	0.222435	0.295911	29.9134	53.9571	0.0935926	0.316286	15.5704	99.3	100	56.4	39.5	35.8	64.7	38.2
91	cheese burger	Cheeseburger	Cheeseburger	10	1	12	12	14	217	3	1	240	2.4	28.8	28.8	33.6	520.8	0.504749	0.338003	0.157248	0.372278	40.4318	52.9246	0.130741	0.351191	15.7164	98.9	97.7	48.8	37.5	38.2	53.4	34.2
92	cheddar cheese	Kaese	Cheddar	1	0.06	25	35	0	400	4	6	600	0.36	150	210	0	2400	0.486891	0.373475	0.139634	0.31643	26.4181	27.2329	0.0644074	0.203544	14.1692	95.3	100	53.9	32.7	29.3	60.8	36.4
93	muffins	Muffins	Muffins mit Glasur	5	0.833	5	22	43	393	4	3	180	1.499	9	39.6	77.4	707.4	0.530721	0.271296	0.197983	0.512541	60.8578	73.9516	0.121019	0.236115	16.3526	100	99.2	57.4	37.9	36.2	58.1	33.1
94	jelly candies	Bonbons (geliert)	Bonbons	4	0	0.1	0.1	84.4	340	3	10	100	0	0.1	0.1	84.4	340	0.438599	0.320559	0.240841	0.128552	14.899	66.9086	0.0292037	0.227175	15.252	90.1	94.1	41.6	28.1	27.7	41.8	20.4
95	raspberry cake	Himbeertorte	Himbeercremetorte	5	0.4	3.5	12	34.3	262	3	1	800	3.2	28	96	274.4	2096	0.394385	0.316839	0.288777	0.45263	38.8316	49.2896	0.126741	0.28001	16.0965	97.8	100	50.4	34.6	45.5	56.4	32.8
96	cake (gugelhupf)	Kuchen Gugelhupf	Gugelhupf	5	2.52	5.9	21	52	428	4	1	500	12.6	29.5	105	260	2140	0.496563	0.334604	0.168833	0.340996	44.109	49.7857	0.0751481	0.220378	16.182	96.9	96.7	53	32.5	27.4	52.3	33.5
97	chocolate cake	Schokokuchen	Schokocremekuchen	5	1.6	5.9	16.8	27.4	286	3	2	150	2.4	8.85	25.2	41.1	429	0.455592	0.32937	0.215037	0.466193	69.4592	59.3334	0.0943889	0.202468	16.4488	98.1	99.9	58.6	37.1	37.7	64.1	41
98	cheese platter	Kaeseplatte	Kaese mit Obst 2	1	0.077	24	29	0.05	357	4	13	1600	1.232	384	464	0.8	5712	0.481931	0.345909	0.17216	0.353715	36.9253	59.302	0.0916852	0.259207	14.5611	88.9	99.4	57.7	36.4	46.4	62.9	39.9
99	cake	Kuchen	Gugelhupf Zitrone	5	1.44	5.9	21	52	428	4	1	500	7.2	29.5	105	260	2140	0.388657	0.342727	0.268616	0.36043	32.4088	40.7568	0.0831296	0.23064	16.0106	93.2	90.7	50.9	33.6	27.5	53.1	32.5
100	chocolate cake	Schokotorte	Schokotorte	5	1.767	4.6	19	28.6	307	3	1	1200	21.204	55.2	228	343.2	3684	0.383988	0.314585	0.301427	0.346248	44.4171	73.1332	0.103278	0.298277	16.4559	99.2	98.5	54.4	35.2	43.8	58.2	35.5
101	Donut (chocolate)	Donut (schoko)	Donuts	5	2.333	6.6	33.3	46	510	4	1	50	1.167	3.3	16.65	23	255	0.418389	0.336666	0.244944	0.184207	23.2259	74.1954	0.0462593	0.251126	14.3224	98.4	99	49.9	38	25.8	53.6	36.8
102	hard candies	Bonbons (bunt)	Bonbons_1	4	0.05	1	0.3	95	391	4	23	100	0.05	1	0.3	95	391	0.341932	0.360478	0.29759	0.139841	11.9972	59.1333	0.0538519	0.385094	15.3393	87.6	88.5	45.7	26.9	30.6	41.5	24.2
103	raspberry cake	Himbeertorte	Himbeercremetorte	5	1.133	3.5	12	34.3	262	3	1	120	1.36	4.2	14.4	41.16	314.4	0.508829	0.26519	0.225981	0.350759	43.9715	57.6105	0.078963	0.22512	16.5735	97.8	97.8	54.7	42.5	42.1	60.4	39.9
104	tortilla chips	Chips (Tortilla)	Chips (Tortilla)	9	4.267	5.9	22	62	478	4	12	25	1.067	1.475	5.5	15.5	119.5	0.463051	0.366507	0.170442	0.321459	22.7297	35.3463	0.0872778	0.271505	14.4576	98.9	99.1	49	29.1	20.5	47.2	26.2
105	filled waffles	Waffeln (gefuellt)	Waffelherzen gefuellt	5	0.7	5.1	11.6	68.2	397	4	3	50	0.35	2.55	5.8	34.1	198.5	0.497832	0.330236	0.171933	0.363356	39.9026	45.8518	0.166815	0.459095	16.3758	94.9	88.1	50.2	37.5	36.7	54	35.2
106	Sacher cake	Sachertorte	Sachertorte	5	3.425	5.4	15.4	51.5	375	4	1	750	25.688	40.5	115.5	386.25	2812.5	0.532194	0.263359	0.204447	0.517559	82.8466	55.4693	0.111648	0.215721	16.0645	99.9	98.7	53	39.7	34.7	65.5	43.9
107	chocolate cake	Schokotorte	Schokotorte Stueck	5	3.55	5.4	15.4	51.5	375	4	1	120	4.26	6.48	18.48	61.8	450	0.451371	0.288917	0.259712	0.305063	50.0265	63.7381	0.053537	0.175495	16.1423	97.9	97.6	62.3	43.5	44.7	65.5	43.6
108	pizza (ham and mushrooms)	Pizza (Schinken,Pilze)	Pizza Schinken	10	2	6.55	5.64	21.27	165.45	2	1	550	11	36.025	31.02	116.985	909.975	0.453848	0.333448	0.212704	0.46377	36.4081	40.2398	0.176407	0.380377	16.0573	99.4	99.9	55.4	38.9	40	62.5	39.6
109	peanuts	Erdnuesse	Erdnuesse	9	8.2	28	47	11	595	4	40	50	4.1	14	23.5	5.5	297.5	0.512827	0.373584	0.113589	0.441419	43.4148	57.6621	0.139796	0.316698	14.3491	78	90.1	47.9	23.8	21.7	53.7	27.4
110	Nuts (cashews)	Nuesse (Cashew)	Cashews	9	3.667	20	50	21	621	4	40	50	1.833	10	25	10.5	310.5	0.499995	0.358038	0.141967	0.373878	38.3494	58.1067	0.112481	0.300851	14.7997	98.2	99.7	49.8	33.6	25.7	59.1	32.1
111	bar of chocolate with nuts	Schokolade Nuss	Schokolade nuss	4	3.2	8.4	36	49	555	4	1	100	3.2	8.4	36	49	555	0.44599	0.317097	0.236913	0.175326	21.0021	58.5322	0.0671667	0.383096	14.0998	91.8	96.9	55.7	42.9	30.1	63.8	43
112	opened bar of chocolate with nuts	Schokolade (Nuss)	Schokolade nuss	4	3.233	8.4	36	49	555	4	1	100	3.233	8.4	36	49	555	0.358721	0.328608	0.312671	0.24213	24.7169	70.047	0.0850556	0.351281	15.4099	98.5	99.4	57	38.7	33.4	64.8	40.6
113	chips	Chips	Chips	9	4.133	6	35	49	543	4	30	30	1.24	1.8	10.5	14.7	162.9	0.479374	0.383528	0.137098	0.23937	19.3852	37.1202	0.0797778	0.333282	14.7792	97	100	46.3	30.2	24.2	56.8	34.5
114	croissants	Croissants	Croissants	5	2.1	5.2	18.8	35.9	333	3	3	150	3.15	7.8	28.2	53.85	499.5	0.530403	0.320745	0.148852	0.264807	28.9469	46.596	0.108463	0.409592	14.7314	100	98.6	55.8	38.4	30.7	61.4	42.7
115	sundae (with raspberries)	Eisbecher (Himbeer)	Eisbecher	4	0.433	1.9	12.37	15.9	198	3	1	300	1.299	5.7	37.11	47.7	594	0.480294	0.30131	0.218396	0.182152	17.7919	66.2105	0.0521667	0.286391	15.5314	98.1	98.3	65.4	45	52	71.5	47.5
116	chocolate popsicle with nuts	Eis am Stiel (Mit Nuss)	Eis am Stiel mit Mandelsplitter	4	0	4.65	19.77	29.07	314	3	1	86	0	3.999	17.0022	25.0002	270.04	0.516774	0.314503	0.168724	0.186011	29.5018	46.4601	0.0366667	0.197121	15.0184	100	97.8	54.2	29.9	29.2	59.7	33.5
117	chips	Chips	Stapelchips	9	3.033	5.9	35	48	539	4	15	34	1.031	2.006	11.9	16.32	183.26	0.534175	0.364312	0.101513	0.280474	27.7954	30.329	0.0623333	0.222243	14.7184	94.2	98.1	48	27.5	26.1	49.5	27.8
118	sundae (peach)	Eisbecher (Pfirsich)	Eis	4	0.697	1.4	5.96	29.28	178	2	1	250	1.742	3.5	14.9	73.2	445	0.440538	0.327116	0.232346	0.296448	25.5539	55.7195	0.0803704	0.271111	16.2379	85.2	89.9	55.1	39.5	49.7	61.5	35
119	donut	Donut	Donut 1	5	1.333	7.23	26.86	35.5	413	4	1	50	0.666	3.615	13.43	17.75	206.5	0.474786	0.337118	0.188096	0.350463	28.9445	43.7208	0.0926667	0.264412	13.6952	89.7	87.1	41.4	31.3	27.5	46.1	27.6
120	croissants	Croissants	Croissants	5	2.1	5.2	18.8	35.9	333	3	4	280	5.88	14.56	52.64	100.52	932.4	0.491128	0.343008	0.165864	0.304856	26.0671	36.7675	0.0895926	0.293885	14.3198	99.4	100	51.6	34.3	28.5	59.3	30
121	filled cookie with walnut	Keks (mit Walnuss)	Plaetzchen doppelt und gefuellt	4	1.547	6.8	30.57	53.32	515	4	1	10	0.155	0.68	3.057	5.332	51.5	0.492698	0.331457	0.175844	0.238552	22.5581	59.0046	0.0882778	0.370057	15.3029	90.1	82	51	30.6	38.7	51.8	27.4
122	cake	Kuchen	Ruehrkuchen	5	0.833	5.4	18.5	33.5	320	3	1	100	0.833	5.4	18.5	33.5	320	0.448412	0.365173	0.186414	0.382441	31.6881	43.2228	0.0816111	0.213395	15.2229	95.1	87.3	55.5	35.9	35.9	59.7	37.2
123	lollipops	Lollies	Lollies	4	0	0.7	2.7	90.9	391	4	3	100	0	0.7	2.7	90.9	391	0.377908	0.323603	0.298489	0.125622	8.62485	64.2553	0.0557037	0.443422	15.4402	97.4	98.8	38.5	24.2	29.4	39.7	21
124	lollipops	Lollies	Lollies	4	0	0.7	2.7	90.9	391	4	2	100	0	0.7	2.7	90.9	391	0.397039	0.365427	0.237534	0.235163	14.429	42.8677	0.0747407	0.317825	14.7131	91.8	94.7	33.8	21.3	35.6	29.9	12.4
125	hard candies	Bonbons (bunt)	Bonbons_2	4	0	1	0.3	95	391	4	50	250	0	2.5	0.75	237.5	977.5	0.372931	0.355231	0.271838	0.214693	22.4268	64.656	0.074037	0.344851	15.5242	87.5	93	43.5	27.3	29.8	44.8	23.5
126	pastries and donuts	diverses Gebaeck (Donuts)	Gebaeck	5	1.77	6.4	22.59	39.78	390	4	9	590	10.443	37.76	133.281	234.702	2301	0.480876	0.327963	0.191161	0.522656	58.4245	53.5412	0.194556	0.372244	17.149	97.3	99.8	58.7	41.3	51.7	66.5	44.1
127	Sacher cake	Sachertorte	Schokotorte Stueck	5	2.433	5.4	15.4	51.5	375	4	1	65	1.581	3.51	10.01	33.475	243.75	0.580672	0.269865	0.149463	0.3351	62.344	61.5633	0.0551852	0.164683	16.3319	99.6	99.8	60.3	34.8	37.8	65.9	36.1
128	hard candies	Bonbons (bunt)	Bonbons_3	4	0	1	0.3	95	391	4	500	2000	0	20	6	1900	7820	0.409395	0.315068	0.275537	0.318167	26.6615	59.4882	0.124148	0.390198	16.4119	94.2	97.6	46.2	34.3	48.5	46.2	26.4
129	christmas sweets	Weihnachtsteller	Weihnachtsteller	4	3.263	6.22	9.43	36.62	261	3	35	450	14.683	27.99	42.435	164.79	1174.5	0.528404	0.283687	0.18791	0.408348	53.6054	69.7395	0.103056	0.252372	16.5547	96.6	97.1	54.5	35.6	53.5	57.3	32.7
130	cake	Kuchen	Gugelhupf Schoko	5	2.767	5	18	60	421	4	1	120	3.32	6	21.6	72	505.2	0.437775	0.350069	0.212156	0.200356	20.0081	50.3192	0.0688148	0.343463	16.7636	96.4	94.7	50.6	32	26.2	54.5	33.2
131	pizza (veggie/cheese)	Pizza (Gemuese/Kaese)	Pizza Vegetarisch	10	2.2	6.55	5.64	21.27	165.45	2	1	550	12.1	36.025	31.02	116.985	909.975	0.500503	0.328582	0.170915	0.539793	56.2872	62.9376	0.216481	0.401046	16.8298	95	95.7	50.9	39.6	51.9	58.5	39.7
132	cheese	Kaese	Hartkaese	1	0	29	30	0	383	4	1	350	0	101.5	105	0	1340.5	0.417077	0.351913	0.23101	0.41743	31.8322	42.2187	0.0857963	0.205535	14.8402	92.1	92.3	50.4	30.2	30.1	52.2	29.7
133	strawberry cake	Erdbeerkuchen	Erdbeerkuchenstueck	5	0.9	1	4	30	179	2	1	150	1.35	1.5	6	45	268.5	0.564376	0.27527	0.160354	0.284674	35.9451	59.9844	0.0752593	0.26437	16.0111	97.9	96.3	57.5	39.7	37.2	62.2	38.1
135	cake	Kuchen	Bananenbrot	5	1.867	5.9	21	52	428	4	3	180	3.361	10.62	37.8	93.6	770.4	0.455389	0.336902	0.207709	0.520089	53.2704	61.1915	0.148315	0.285172	17.3268	86.4	86.7	47	27	33.4	51.6	29.7
136	cake	Kuchen	Joghurtkuchen mit Trauben	5	0.6	3.1	9.3	29.9	217	3	1	100	0.6	3.1	9.3	29.9	217	0.389556	0.352135	0.258309	0.362922	29.1129	54.215	0.0715741	0.197216	13.7486	85	83.5	42.3	31.3	43.3	43.4	29.5
138	muffin with green topping	Muffin mit Topping (gruen)	Muffin mit gruenem Topping	5	0.8	2.85	10.9	67.65	370	4	1	50	0.4	1.425	5.45	33.825	185	0.354745	0.434194	0.211061	0.288752	32.8143	45.0857	0.0812778	0.28148	14.856	96.9	92.7	41.8	26.1	34.4	42.4	24.9
139	cake	Torte	Schokotorte Stueck	5	1.2	6.2	20.7	33.3	346	3	1	100	1.2	6.2	20.7	33.3	346	0.511903	0.30187	0.186228	0.255304	39.2029	67.3516	0.0617593	0.241905	16.5942	96.2	92.6	54.2	39.6	41.1	58.6	38.4
140	chocolate popsicle with nuts	SchokoEis am Stiel (Mit Nuss)	Eis am Stiel mit Mandelsplitter	4	0	3.8	16.9	24.6	280	3	1	65	0	2.47	10.985	15.99	182	0.475871	0.319423	0.204706	0.2814	37.0533	56.0522	0.0757037	0.269025	15.0268	97.9	98.9	55.1	36.8	36.8	65.6	42.2
141	lasagna	Lasagne	Lasagne	10	1.067	5.7	5.1	13	123	2	1	350	3.734	19.95	17.85	45.5	430.5	0.548316	0.287914	0.16377	0.416874	41.0981	74.5513	0.103	0.247077	15.9587	75.1	85.1	49.4	34	46.2	56.4	34.3
142	pasta bake	Nudelauflauf	Nudelauflauf	10	1.933	5.7	5.1	13	123	2	1	1000	19.33	57	51	130	1230	0.504961	0.319105	0.175934	0.429989	46.1102	56.9856	0.137481	0.319733	16.8332	85.1	88.3	51.9	32.1	50.2	55.7	30.6
143	pasta bake	Nudelauflauf	Nudelauflauf	10	2.267	5.7	5.1	13	123	2	1	800	18.136	45.6	40.8	104	984	0.532029	0.304289	0.163682	0.390826	55.4614	62.5867	0.104426	0.267193	16.7102	88.8	98.7	62.5	43.9	49.8	69.2	46.2
144	pasta bake	Nudelauflauf	Nudelauflauf	10	1.8	5.7	5.1	13	123	2	1	800	14.4	45.6	40.8	104	984	0.506943	0.306994	0.186063	0.395959	50.5573	67.5313	0.122778	0.310077	16.8707	87.6	92	48.9	32.9	45.3	56.3	28.8
145	lasagna	Lasagne	Lasagne	10	1.067	5.7	5.1	13	123	2	1	350	3.734	19.95	17.85	45.5	430.5	0.534013	0.31847	0.147517	0.345378	40.4295	56.756	0.0973519	0.281871	17.0536	85.7	95.8	53.2	40.9	43.7	59.2	41.2
146	cheese cake	Kaesekuchen	Kaesekuchen	5	0.667	6.8	9.4	34.3	255	3	1	100	0.667	6.8	9.4	34.3	255	0.435604	0.345985	0.21841	0.414207	25.091	49.3996	0.129556	0.312779	14.1056	34.9	62.4	43.4	27.4	34.4	40.3	22
147	marshmallows (flat)	Maeusespeck	Maeusespeck	4	0	4.6	0.2	79.6	338	3	4	30	0	1.38	0.06	23.88	101.4	0.373374	0.320857	0.305769	0.486659	26.1404	51.9559	0.100407	0.20632	14.58	44.6	51.3	34	19.5	31.3	24.6	14.2
148	round shortbread cookies	Spritzgebaeck	Spritzgebaeck	4	2.4	6.7	29	62	536	4	2	35	0.84	2.345	10.15	21.7	187.6	0.483211	0.347539	0.16925	0.366319	31.4147	41.0213	0.122889	0.33547	15.1167	98	98	48.5	26.2	24.9	46.9	26.8
149	NicNac (crusty peanuts)	NicNac	NicNacs	9	5.4	15	33	40	529	4	50	70	3.78	10.5	23.1	28	370.3	0.571652	0.304515	0.123832	0.510785	64.4866	33.8735	0.113	0.221228	16.3237	58.1	73.4	40.3	27.9	29.1	46	26.3
151	lemon cake	Zitronenkuchen	Zitronenkuchen	5	0.833	5.3	23	52	435	4	2	150	1.249	7.95	34.5	78	652.5	0.406948	0.354662	0.23839	0.590878	29.489	24.8131	0.127407	0.215624	14.8634	98.3	96.9	49.4	29.6	28.7	54.9	31.2
152	peanut puffs	Erdnussflips	Erdnussflips	9	4.933	13	24	56	500	4	25	20	0.987	2.6	4.8	11.2	100	0.501556	0.343837	0.154607	0.491393	45.5676	46.2531	0.197796	0.402522	16.4341	85.8	89.5	42.1	20.2	25.6	42.5	21.5
153	gummi candy (cola)	Colaflaschen (Gummibaerchen)	Colaflaschen (Gummibaerchen)	4	0	3	0	78	343	3	10	40	0	1.2	0	31.2	137.2	0.519384	0.290625	0.189992	0.232578	29.0579	65.5781	0.0734259	0.315705	15.1357	97.3	94.1	44.9	28.6	26.4	45.2	27.4
154	gummi candy and licorice mix	Gummibaerchen Colorado	Gummibaerchen mit Lakritz	4	0.033	3.4	2	79.8	352	4	15	20	0.007	0.68	0.4	15.96	70.4	0.439955	0.311686	0.24836	0.374937	35.8849	67.3084	0.0806667	0.215147	15.1035	99.5	100	46.5	31	38.7	52.4	28.5
155	crackers	TUC Kekse	TUC Kekse	9	2.367	7.8	22	63	486	4	5	25	0.592	1.95	5.5	15.75	121.5	0.430109	0.342388	0.227503	0.346559	26.5128	59.4808	0.128704	0.371376	14.9968	100	99.5	46.8	28.1	24.6	53.5	26.1
156	challah (braided yeast bun) with raisins	Hefezopf mit Rosinen	Hefezopf Rosinen	5	2.333	7.5	7	52	306	3	1	50	1.167	3.75	3.5	26	153	0.551999	0.325538	0.122463	0.270407	29.9338	44.103	0.0681667	0.252089	16.3527	94.6	96.1	51.3	30.5	34.3	54.2	31.4
157	gummi candy (gold bears)	Gummibaerchen	Gummibaerchen	4	0.05	6.3	0.1	77.4	340	3	30	100	0.05	6.3	0.1	77.4	340	0.575715	0.346853	0.0774324	0.581052	81.577	42.2037	0.115481	0.198746	15.739	98.8	98.9	45.1	29.7	36.4	52.1	25.5
158	cookies filled with chocolate cream	Prinzenrolle	Doppelkeks	4	3.3	6.1	21	68	491	4	2	48	1.584	2.928	10.08	32.64	235.68	0.445911	0.33972	0.214369	0.408641	29.1466	57.0995	0.111296	0.272357	15.0428	91.6	91.1	43	25.4	27.9	47.6	25.9
159	mini chocolate cake bar	Tender Schokoriegel	Schokoriegel soft	4	1.167	5.5	33.1	45.5	508	4	1.5	48	0.56	2.64	15.888	21.84	243.84	0.450946	0.29707	0.251983	0.4468	69.316	47.7915	0.0997778	0.223316	16.2374	92.6	88.9	48.4	32.8	36.9	56.7	31.2
160	nuts covered in chocolate	Schokonuesse	Schokonuesse	4	2.433	8.4	21.5	64.8	486	4	15	50	1.216	4.2	10.75	32.4	243	0.441777	0.297114	0.261109	0.228426	34.4492	56.8236	0.0712222	0.311796	15.6803	93.2	95.1	47.1	32.9	23.9	54.7	35
161	mini chocolate marshmallows	MiniDickmann	Dickmann	4	1.5	3.6	16.8	63.7	421	4	6	49.8	0.747	1.7928	8.3664	31.7226	209.658	0.407743	0.32221	0.270047	0.284019	30.5715	77.4431	0.0397222	0.139858	14.6126	97.6	97.6	51.4	38.4	31.3	55.4	36.7
162	chocolate cream cake	Schokokuchen	Schokotorte eckig	5	2.033	5	23	52	435	4	2	140	2.846	7	32.2	72.8	609	0.424308	0.293421	0.282272	0.436952	82.9972	56.2586	0.0745926	0.170711	16.6301	81.9	74.1	48	32.7	39.7	54.8	32
163	chocolate cake	Schokokuchen	Schokokuchen	5	2.267	5.2	26	48	451	4	2	100	2.267	5.2	26	48	451	0.453349	0.300718	0.245933	0.516352	74.8834	58.7861	0.171574	0.332281	17.0134	91.1	92	55.4	40.4	32.1	63.3	39.6
164	mini cookies with chocolate on one side	Leibnizkeks klein	Butterkekse mini mit Schokolade	4	2.8	7.5	22	66	488	4	3	5.6	0.157	0.42	1.232	3.696	27.328	0.44435	0.330076	0.225574	0.285237	32.2149	62.1192	0.0457407	0.16036	14.9172	99.6	96.7	54.2	33.7	26.3	61.5	38.4
165	cornflakes and almonds covered in chocolate	Chococrossies	Chococrossies	4	3.2	5.6	27.5	57.3	505	4	8	40	1.28	2.24	11	22.92	202	0.487751	0.294454	0.217794	0.253289	37.4642	58.6364	0.103648	0.409209	16.8093	94.4	95.9	52.4	38.2	33.2	60.8	39.7
166	chocolate marshmallows	Dickmann	Dickmann	4	1.4	3	10.6	67.1	377	4	2	56	0.784	1.68	5.936	37.576	211.12	0.451241	0.293246	0.255513	0.454341	87.68	62.8608	0.0391481	0.0861647	15.9364	99.1	94	47.5	30.4	26.8	51.9	29
167	some bars of chocolate (stacked)	Vollmichschokolade	Schokolade dunkel	4	3.6	7.5	29.5	58.5	530	4	1	100	3.6	7.5	29.5	58.5	530	0.425774	0.305169	0.269057	0.493056	80.9076	54.4558	0.114981	0.233202	15.7554	100	96.8	52.4	41	29.4	62.8	36.9
168	puffed rice covered in chocolate	Schokoladen-Puffreis	Schokoladen-Puffreis	4	2.333	6.4	29.1	60.5	533	4	2	34	0.793	2.176	9.894	20.57	181.22	0.467932	0.309013	0.223055	0.260933	29.9333	59.6547	0.114926	0.440442	15.9374	96.5	91.1	49.7	33.9	35.1	56.2	35.8
169	donut (chocolate topping)	Schokodonut	Donuts	5	2.233	6.9	27	36.4	420	4	1	55	1.228	3.795	14.85	20.02	231	0.428008	0.305768	0.266223	0.48143	73.3065	45.6435	0.0694074	0.144169	14.2751	100	100	43.8	36.3	25.7	50.7	34.3
170	chocolate bar filled with strawberry and yogurt cream	Yogurette	Yogurette	4	1.2	5	35.6	56	566	4	1.5	18.8	0.226	0.94	6.6928	10.528	106.408	0.455275	0.309172	0.235553	0.149526	23.1564	49.7288	0.049037	0.32795	15.0308	90.4	87.7	49.6	35	35	56.7	36.4
171	jaffa cookies	Softies	Softcookies	4	2	3	10	69	384	4	1.5	19.5	0.39	0.585	1.95	13.455	74.88	0.478033	0.264642	0.257325	0.204256	31.9946	84.5104	0.0584259	0.286043	15.5324	93.4	91.3	43.3	30.9	31.1	47.6	32.7
172	Toffifay (filled caramel cup)	Toffifee	Toffifee	4	2	5.9	28.6	58.5	514	4	3	24.9	0.498	1.4691	7.1214	14.5665	127.986	0.502905	0.279132	0.217964	0.143811	21.3325	63.0085	0.0451111	0.313683	14.9948	86.5	87.4	53.6	37.2	32	58.5	38.5
173	chocolate bar filled with milk cream	Kinderriegel	Kinderriegel	4	0.9	10	34	53	558	4	1.5	31.5	0.284	3.15	10.71	16.695	175.77	0.475497	0.301421	0.223082	0.120348	19.4398	56.38	0.0362963	0.301594	14.9484	94.2	93.2	56.4	40.9	26.6	62.4	45.2
174	chocolate pieces	Schokoladenstueckchen (diverse)	Schokoladenmix	4	1.633	8	36	46.5	545	4	1	100	1.633	8	36	46.5	545	0.450121	0.300299	0.24958	0.414744	60.7122	69.674	0.116111	0.279958	16.8275	94	97.4	53.1	31.2	31.7	61.6	32.2
175	brie cheese	Brie	Weichkaese	1	0	17	32.5	1	365	4	1	150	0	whole_food_complete	48.75	1.5	547.5	0.380527	0.357369	0.262104	0.292948	13.7573	26.1132	0.0429444	0.146594	13.8844	84.8	91.7	48.9	33.6	28.6	50.7	28.7
176	salami sausage	Wurst Salami	Salami	6	0	17	32.13	0.22	365	4	0.5	250	0	42.5	80.325	0.55	912.5	0.483063	0.269821	0.247117	0.285674	31.3673	60.7357	0.132704	0.464528	17.8737	93.1	90.1	41.8	30	30.6	42.6	24.6
177	cookies filled with chocolate cream	Doppelkeks	Doppelkeks	4	3.3	5.5	16.5	71.8	460	4	4	100	3.3	5.5	16.5	71.8	460	0.523969	0.308339	0.167693	0.232181	24.6483	59.4159	0.0934815	0.402622	15.6057	99.2	98.3	52.6	30.7	29.4	54.5	32.9
178	German krapfen	Krapfen	Krapfen	5	1.533	6.4	13.9	41.5	333	3	2	126	1.932	8.064	17.514	52.29	419.58	0.412412	0.334068	0.25352	0.255396	22.1026	41.7241	0.082	0.32107	16.8738	98.1	97.3	53.7	29.8	27.2	57.7	28.5
179	marble cake	Marmorkuchen	Ruehrkuchen	5	2	5.3	22	48.3	423	4	0.8	450	9	23.85	99	217.35	1903.5	0.493101	0.322883	0.184017	0.370233	57.9661	45.843	0.0664074	0.179366	15.9098	100	99.9	47.9	33.7	30.6	60.3	33.7
180	muesli bar (oatmeal)	Muesliriegel - oatmeal	Muesliriegel	4	5.1	6.9	11.9	64.8	345	3	1	25	1.275	1.725	2.975	16.2	86.25	0.503875	0.300178	0.195947	0.182515	22.4523	58.9308	0.0871667	0.477587	16.3608	100	97.6	51.5	28.3	37.7	50.8	26.7
181	bowl of muesli (granola)	Muesli in der Schuessel	Muesli	5	9.933	9	6.04	59.6	343	3	1	250	24.832	22.5	15.1	149	857.5	0.470555	0.327525	0.20192	0.329737	34.7701	63.0611	0.133889	0.406047	16.85	92	97.8	54.9	31.6	49.7	53.3	33.5
182	bowl of rice	Reisschale	Reisschale	5	0.533	7.3	1.3	77	349	4	300	100	0.533	7.3	1.3	77	349	0.35472	0.323874	0.321406	0.228985	23.5288	55.8483	0.0793148	0.346375	14.6909	99.4	100	59.1	31.4	20	59	39
183	peanuts	Erdnuesse	Erdnuesse	9	8	25	50	14	600	4	50	75	6	18.75	37.5	10.5	450	0.462725	0.339536	0.19774	0.285226	21.6041	34.9736	0.107185	0.37579	15.1945	96.9	99.9	50.4	28.8	19.3	54.1	25.7
184	chocolate croissants	Schokocroissants	Croissants	5	1.85	6.8	33.6	50.3	429	4	2	170	3.145	11.56	57.12	85.51	729.3	0.475771	0.329378	0.194851	0.264241	35.5592	41.9459	0.0512778	0.194057	15.6157	92.4	92	48.9	30.1	28.2	55.7	31.4
185	sausages (frankfurter)	Wuerstchen	Wuerstchen	6	0.55	15.19	26.37	0.28	296	3	5	300	1.65	45.57	79.11	0.84	888	0.458018	0.340415	0.201567	0.33667	31.214	40.3903	0.0726852	0.215894	15.3506	97.4	97.3	42.3	28.9	24.5	44.9	21.3
186	pretzel sticks	Salzstangen	Salzstangen	9	4.133	9	0.5	75.3	347	3	14	28	1.157	2.52	0.14	21.084	97.16	0.540082	0.316315	0.143604	0.20103	24.1767	68.7694	0.0888519	0.441984	16.5666	100	100	49.6	27.2	21.6	51.3	25.7
187	croissant	Croissant	Croissants	5	2.175	5.2	18.8	35.9	333	3	1	70	1.522	3.64	13.16	25.13	233.1	0.553223	0.284915	0.161862	0.254907	29.7021	43.6768	0.0779259	0.305703	16.4588	99.2	100	54.5	36.4	25.4	63.2	31.7
188	doner kebab	Doener	Doener	10	1.76	12.11	4.91	24.31	192	2	1	350	6.16	42.385	17.185	85.085	672	0.53409	0.289511	0.176399	0.464444	55.5183	59.8977	0.138685	0.298604	16.554	95.2	98.5	45.3	32.9	54.3	57.5	26.9
189	slice of bread topped with chocolate cream	Nutella-Brot	Nutella-Brot	10	2.683	8.17	14.5	53.83	382.8	4	1	90	2.415	7.353	13.05	48.447	344.52	0.458851	0.324427	0.216722	0.362859	53.6706	40.062	0.0480556	0.132436	16.2088	96.6	97.2	44.4	24.7	23.2	42.3	19
190	meatballs (patties)	Frikadellen	Frikadellen	6	0.667	14	22	11	299	3	3	280	1.868	39.2	61.6	30.8	837.2	0.47116	0.317797	0.211043	0.409922	65.7585	44.4742	0.123759	0.301909	16.1819	35.7	57.1	34.7	26.4	30.5	33.7	21.1
191	grilled bavarian sausage	Gegrillte Weißwuerste	Gegrillte Weisswuerste	6	0.05	11	25	1	273	3	3	210	0.105	23.1	52.5	2.1	573.3	0.49203	0.314691	0.193279	0.429533	49.672	60.4263	0.147333	0.343008	16.8524	55.9	65.1	28.3	24.4	26.4	24.8	14
192	apple	Apfel	Aepfel	2	2.05	0.31	0.4	11.4	52	2	1	150	3.075	0.465	0.6	17.1	78	0.524221	0.311927	0.163853	0.315248	36.4265	42.5471	0.0470926	0.149383	13.4375	98.9	100	70.2	38.4	24.9	73.8	49.4
193	crisp bread	Knaeckebrot	Knaeckebrot	5	10.7	11.22	5.26	69	372	4	2	26	2.782	2.9172	1.3676	17.94	96.72	0.466317	0.350541	0.183142	0.245222	23.4845	39.4716	0.115056	0.469189	16.4225	99.8	99.6	49.3	23.4	25.8	44.1	23.4
194	kiwi	Kiwi	Kiwis	2	2.667	0.87	0.55	9.37	53	2	0.5	50	1.333	0.435	0.275	4.685	26.5	0.40529	0.421898	0.172812	0.263219	38.3859	43.1618	0.0389444	0.147955	14.5225	100	100	68.1	40.5	32.9	68.4	47.5
195	cucumber slice	Gurkenscheibe	Gurkenscheibe	3	0.75	0.43	0.14	1.3	9	1	0	11	0.082	0.0473	0.0154	0.143	0.99	0.370125	0.381055	0.24882	0.267948	13.8759	30.7146	0.0491296	0.183355	14.1058	98.8	98.8	58.8	28.3	22.2	58.4	37.5
196	salad plate	Salatteller	Salatteller mit Karotte und Tomate	10	1.433	1.73	0.35	3.5	25	1	40	150	2.15	2.595	0.525	5.25	37.5	0.42307	0.358176	0.218754	0.544974	57.5765	76.7651	0.128	0.234874	15.357	99.2	99.1	67.6	43	58.8	71.8	45.4
197	tomatoes	Tomaten	Tomate	3	1.2	0.9	0.2	2.47	16	1	6	780	9.36	7.02	1.56	19.266	124.8	0.625483	0.233518	0.140999	0.282278	46.1027	46.2337	0.062037	0.219773	15.0043	100	100	71	37.4	24.5	67.9	44.5
198	paprika peppers (red, green, yellow)	Paprika bunt	Paprika bunt	3	3.6	1.22	0.37	4.87	29	1	3	500	18	6.1	1.85	24.35	145	0.462093	0.383408	0.154499	0.323122	39.6553	53.7043	0.0779074	0.241108	14.9048	100	100	60.4	33.5	31	64.2	38.5
199	watermelon	Wassermelone	Wassermelone	2	0.25	0.26	0.09	3.64	17	1	0.2	300	0.75	0.78	0.27	10.92	51	0.572133	0.279102	0.148765	0.21627	24.932	50.3866	0.054	0.249687	14.7642	99.9	100	65.2	37.9	24.2	70.4	44.5
200	oranges	Orangen	Orangen	2	1.733	0.72	0.14	6.62	34	1	3.5	560	9.705	4.032	0.784	37.072	190.4	0.509759	0.386118	0.104123	0.253911	26.1693	47.7789	0.0453148	0.178467	15.3608	100	98.4	67.3	43.7	26.3	72.8	49
201	salad plate	Salatteller	Salatteller	3	1.467	2.6	0.3	3.9	31	1	25	50	0.734	1.3	0.15	1.95	15.5	0.392968	0.392544	0.214488	0.5464	62.6269	67.9053	0.172815	0.316279	16.382	97.1	99	67.1	37.4	42.3	68.1	45.8
202	blueberries	Heidelbeeren	Heidelbeeren	2	3.95	0.6	0.6	7.3	41	1	50	50	1.975	0.3	0.3	3.65	20.5	0.36401	0.318084	0.317906	0.323663	55.5468	61.305	0.108389	0.334882	15.7616	99.9	99.9	71.6	44.8	27.3	75.9	51.5
203	wildberries mix	Waldbeerenmix	Waldbeerenmix	2	3.667	1	0.5	6	43	1	45	100	3.667	1	0.5	6	43	0.551762	0.283826	0.164412	0.265207	40.9835	60.4168	0.0815556	0.307516	16.0454	99.2	100	69.4	45.4	48.5	73.5	53
204	apples	Aepfel	Aepfel	2	2.05	0.31	0.4	11.4	52	2	9	1350	27.675	4.185	5.4	153.9	702	0.524848	0.346272	0.128879	0.3398	43.3301	53.1225	0.0823333	0.242299	14.8737	100	100	63.6	35.8	30.7	69.2	40.7
205	crisp bread with cottage cheese	Knaeckebrot mit Aufstrich	Knaeckebrot mit Huettenkaese und Sprossen	10	7.35	12.36	0.78	23.9	154	2	1	28	2.058	3.4608	0.2184	6.692	43.12	0.4126	0.342591	0.244809	0.240378	24.7927	54.7338	0.0923333	0.384118	16.4893	68.1	71.7	47.6	26.6	46.2	46.4	22.2
206	raspberries	Himbeeren	Himbeeren	2	5.7	1.2	0.3	4.6	32	1	30	100	5.7	1.2	0.3	4.6	32	0.671886	0.191888	0.136226	0.239559	37.6569	59.6388	0.0621296	0.25935	15.5105	99.6	100	70.3	44.4	27.9	76.4	62.5
207	redcurrants	Johannisbeeren	Johannisbeeren	2	5.85	1.1	0.2	7.2	42	1	50	50	2.925	0.55	0.1	3.6	21	0.597176	0.252552	0.150272	0.1915	28.8195	57.2467	0.0537593	0.280727	15.7633	95.3	94.6	64	37.5	34.4	64	41
208	carrots	Karotten	Karotten	3	2.767	0.8	0.16	3.94	21	1	4	520	14.388	4.16	0.832	20.488	109.2	0.538782	0.337691	0.123527	0.207385	22.1523	51.2274	0.0783519	0.377808	13.8586	100	100	61.8	28.8	23.2	64.1	37.8
209	wildberries mix	Waldbeerenmix	Waldbeerenmix	2	3.667	1	0.5	6	43	1	40	150	5.5	1.5	0.75	9	64.5	0.529176	0.250367	0.220457	0.420304	73.3725	58.3828	0.111056	0.264227	16.2963	100	96.8	74.2	52.2	43.9	83.1	60.9
210	raspberries	Himbeeren	Himbeeren	2	6.033	1.2	0.3	4.6	32	1	60	200	12.066	2.4	0.6	9.2	64	0.573591	0.205831	0.220578	0.322093	48.499	77.9618	0.0768704	0.238659	15.9774	99.7	99.9	70.3	44.4	27.4	73.8	55.8
211	strawberries	Erdbeeren	Erdbeeren	2	2.133	0.78	0.39	5.33	31	1	12	125	2.666	0.975	0.4875	6.6625	38.75	0.483978	0.238373	0.277649	0.34093	59.8137	59.9467	0.096463	0.282941	16.8494	100	100	73.6	48.7	29.9	82.5	65.2
212	veggie mix with dip	Gemuesemix mit Dip	Gemuesemix mit Dip	3	3.287	1.54	2.15	3.04	41.5	1	60	1000	32.87	15.4	21.5	30.4	415	0.447053	0.347952	0.204995	0.373107	39.1267	61.4247	0.131963	0.353686	16.8348	100	99.6	61.6	36.4	46.6	63.8	37.4
213	crisp bread with cottage cheese	Knaeckebrot mit Aufstrich	Knaeckebrot mit Huettenkaese und Radiesschen	10	7.6	12.36	0.78	23.9	154	2	1	28	2.128	3.4608	0.2184	6.692	43.12	0.42141	0.36495	0.21364	0.223267	18.9872	45.8958	0.098463	0.441011	15.0825	90	90.1	56.3	32.2	50.5	57.1	32.5
214	wildberries mix	Waldbeerenmix	Waldbeerenmix	2	3.667	1	0.5	6	43	1	42	125	4.584	1.25	0.625	7.5	53.75	0.492837	0.274571	0.232592	0.327959	48.237	56.5711	0.116963	0.356639	15.8967	97.6	100	72.3	50.5	42	79.2	59.8
215	cucumber and carrot	Gurke und Karotte	Gurke und Karotte	3	2.513	0.782	0.146	3.938	19.4	1	4	50	1.256	0.391	0.073	1.969	9.7	0.453541	0.401045	0.145414	0.322578	36.3864	40.6115	0.052	0.161201	15.1485	99.8	99.2	63.2	35.8	31.2	62.8	36.9
216	nectarines	Nektarinen	Nektarinen	2	2.2	0.83	0.09	11.41	52	2	3	300	6.6	2.49	0.27	34.23	156	0.524726	0.304669	0.170605	0.398793	45.9417	55.3241	0.11063	0.277411	14.2886	95.9	100	68.5	44.6	31.7	72.8	48.8
217	fruit mix: kiwi, cherries, strawberries...	Fruchtmix: Kiwi, Kirsche, Erdbeere..	Fruechte	2	1.873	1	0.45	8.56	48	1	8	195	3.652	1.95	0.8775	16.692	93.6	0.486761	0.342796	0.170443	0.270011	37.306	66.2084	0.0538148	0.199306	16.5278	96.9	99.7	72.5	52.9	50	81.1	62.2
218	fruit mix: nectarines, raspberries, cherries ...	Fruchtmix: Nektarinen, Himbeere, Kirsche, Brombeere..	Fruechte	2	1.99	1	0.2	10.57	50	2	55	590	11.741	5.9	1.18	62.363	295	0.519467	0.276589	0.203944	0.320415	50.0484	70.1041	0.0703519	0.219565	16.2552	99.4	99.8	72.7	47.1	52.8	77.5	58
219	salad plate	Salatteller	Salatteller mit Paprika und Tomate	10	1.533	1.73	0.35	3.5	25	1	60	300	4.599	5.19	1.05	10.5	75	0.415139	0.360321	0.22454	0.218548	20.9217	58.6852	0.0806296	0.368933	16.1516	95.8	99.1	71.4	43	57.2	74.5	50.5
220	fruit plate: melon, pineapple, grapes...	Obstteller: Melone, Ananas, Trauben..	Fruechte	2	1.417	0.83	0.19	8.36	40	1	60	900	12.753	7.47	1.71	75.24	360	0.481662	0.347431	0.170907	0.364359	35.4453	51.5014	0.0941111	0.258292	16.0022	98.8	94.4	69.3	45.8	48.9	74.2	52.9
221	oranges	Orangen	Orangen	2	1.667	1	0.2	9.19	47	1	1.3	200	3.334	2	0.4	18.38	94	0.479131	0.387783	0.133086	0.307178	19.4353	34.0531	0.0967037	0.314813	13.9073	96.5	99.7	65.1	39.1	25.4	67.8	42.2
222	strawberries	Erdbeeren	Erdbeeren	2	2.133	0.78	0.39	5.33	31	1	6	60	1.28	0.468	0.234	3.198	18.6	0.58115	0.291683	0.127167	0.325326	51.1328	52.6948	0.0882407	0.271238	16.8234	99.6	99.6	77.1	58.1	33.8	79.5	64.1
223	wildberries mix	Waldbeerenmix	Waldbeerenmix	2	3.65	1	0.5	6	43	1	90	125	4.562	1.25	0.625	7.5	53.75	0.583704	0.253953	0.162343	0.285137	42.4481	62.8497	0.0885	0.310377	16.3417	96.5	96.3	73.1	51.5	50.8	75.2	58.2
224	wildberries mix	Waldbeerenmix	Waldbeerenmix	2	3.267	1	0.5	6	43	1	70	100	3.267	1	0.5	6	43	0.496442	0.262994	0.240564	0.388244	63.2123	67.3759	0.107537	0.276983	17.5141	99.3	100	78.7	51	53.8	80.2	57.1
225	crisp read with cottage cheese	Knaeckebrot mit Aufstrich	Knaeckebrot mit Huettenkaese und Schnittlauch	10	7.65	12.357	0.78	23.9	154	2	1	28	2.142	3.45996	0.2184	6.692	43.12	0.377692	0.378947	0.243361	0.29023	30.0035	66.2794	0.118222	0.40734	16.6663	86.9	88.6	53.7	30.9	38.4	49.5	31.1
226	crisp bread	Knaeckebrot	Knaeckebrot 2	5	10.767	12	2.5	62	350	4	10	200	21.534	24	5	124	700	0.379642	0.34406	0.276298	0.22997	18.5911	60.4994	0.0839444	0.365023	16.4652	89.4	91.2	46.5	27.3	24.4	39.7	21.7
227	bowl of muesli (granola)	Mueslischuessel	Muesli	5	10.667	5	2.1	28.8	162	2	1	150	16	7.5	3.15	43.2	243	0.468432	0.317311	0.214257	0.315944	34.0653	60.1896	0.130093	0.411758	16.5605	98.4	99.7	59.3	35.4	45.6	60.4	41.5
228	bowl of salad	Salatschuessel	Salatteller	3	1.633	2.6	0.4	4	32	1	15	50	0.816	1.3	0.2	2	16	0.379493	0.381325	0.239183	0.49653	47.4333	76.533	0.129037	0.259878	16.3206	99	99.9	57	24.7	27.7	51.1	22.4
229	salad plate	Salatteller	Salatteller mit Champignons und Tomate	10	1.9	1.73	0.35	3.5	24.6	1	30	130	2.47	2.249	0.455	4.55	31.98	0.441517	0.360913	0.19757	0.412511	47.7288	61.6884	0.11237	0.272406	16.6879	100	100	64.5	40.7	47.1	65.3	46.4
230	oranges	Orangen	Orangen	2	1.733	0.72	0.14	6.62	34	1	8.5	1360	23.569	9.792	1.904	90.032	462.4	0.52635	0.344244	0.129406	0.366133	33.5397	46.0137	0.0870741	0.237821	16.1157	99.3	99.8	67.9	45.6	30.4	71.9	45.4
231	apples	Aepfel	Aepfel	2	2.05	0.31	0.4	11.4	52	2	4	600	12.3	1.86	2.4	68.4	312	0.550442	0.273227	0.17633	0.340226	46.5128	52.7308	0.0658148	0.193444	15.074	99.6	99.8	68.8	38.2	22.7	70.4	44.2
232	bowl of salad	Salatschuessel	Salatteller	3	1.833	2.6	0.4	4	32	1	30	100	1.833	2.6	0.4	4	32	0.374783	0.40138	0.223837	0.498715	76.5424	70.3277	0.149407	0.299585	17.2382	98.2	98	58.3	24.9	32.5	53.2	28.1
233	tomatoes	Tomaten	Tomate	3	1.2	0.9	0.2	2.47	16	1	5	650	7.8	5.85	1.3	16.055	104	0.662752	0.221873	0.115375	0.2822	45.2569	52.3865	0.072537	0.257041	15.3125	100	99.4	69.3	33.3	30.9	69.4	36.7
234	strawberries	Erdbeeren	Erdbeeren	2	2.133	0.78	0.39	5.33	31	1	3	30	0.64	0.234	0.117	1.599	9.3	0.59543	0.248274	0.156297	0.315848	49.8462	53.3976	0.0578148	0.183046	16.0119	99.7	99.7	75.2	53.3	28.9	79.2	63.5
235	blood oranges	Blutorangen	Blutorangen	2	3.867	0.72	0.14	6.62	36	1	4	640	24.749	4.608	0.896	42.368	230.4	0.576189	0.292557	0.131254	0.314285	41.3276	50.2282	0.059	0.187728	15.7536	99.1	98.5	59.7	32.6	29.5	63.9	37.2
236	bowl of rice	Reisschale	Reisschale	5	0.367	7	0.2	78	349	4	1	50	0.184	3.5	0.1	39	174.5	0.402122	0.303561	0.294317	0.282659	34.8495	71.3019	0.0842593	0.298095	15.8411	97.4	99.8	57.9	25.1	21.9	54.6	31
237	curd with chives	Fruehlingsquark	Fruehlingsquark	1	0.05	8.9	10	3.8	143	2	2	350	0.175	31.15	35	13.3	500.5	0.373665	0.352325	0.27401	0.186167	11.5052	52.7383	0.0633333	0.340197	16.2656	81.4	83.4	56	34.8	41.4	57.2	33.4
238	apples	Aepfel	Aepfel	2	2.05	0.31	0.4	11.4	52	2	3	450	9.225	1.395	1.8	51.3	234	0.498283	0.411409	0.0903076	0.201007	26.5135	45.7584	0.0401852	0.199919	14.6147	100	100	63.7	38.3	28	68.7	44.3
239	paprika peppers (red, yellow, orange)	Paprika bunt	Paprika bunt	3	3.6	1.22	0.37	4.87	29	1	3	600	21.6	7.32	2.22	29.22	174	0.548764	0.330048	0.121188	0.283007	32.8387	48.7454	0.0565741	0.199903	15.0767	100	99.2	59	33.6	31.7	59.7	31.2
240	crisp bread with cottage cheese	Knaeckebrot mit Aufstrich	Knaeckebrot mit Huettenkaese und Radiesschen	10	5.8	8	1	25.5	150	2	5	30	1.74	2.4	0.3	7.65	45	0.412179	0.367364	0.220457	0.270559	26.9743	54.2792	0.102333	0.378229	15.6289	71.8	78.5	62.9	37.5	53.2	59	36.7
241	pears	Birnen	Birnen	2	2.725	0.47	0.28	11.53	49	1	2	300	8.175	1.41	0.84	34.59	147	0.487259	0.342022	0.170719	0.180433	17.7317	65.3411	0.0305556	0.169345	15.1374	97.2	95	60.4	34.7	26.2	62.5	41.1
242	veggie mix: cucumber, tomato, peppers...	Gemuesemix: Gurke, Tomate, Paprika, Karotte	Gemuesemix roh	3	2.007	0.57	0.2	3.02	17.8	1	7	670	13.447	3.819	1.34	20.234	119.26	0.449544	0.376985	0.173472	0.332904	37.4757	60.3645	0.124352	0.373537	16.3807	99.6	100	71.7	37.9	47.5	72.7	44
243	strawberries	Erdbeeren	Erdbeeren	2	2.133	0.78	0.39	5.33	31	1	11	110	2.346	0.858	0.429	5.863	34.1	0.568195	0.267183	0.164622	0.360452	48.1966	64.6014	0.112333	0.311646	16.8045	99.2	99.7	74.5	49.9	32.3	80.6	63.3
244	rice waffles	Reiswaffeln	Reiswaffeln	5	3.85	7.7	3.8	79.8	380	4	10	66.7	2.568	5.1359	2.5346	53.2266	253.46	0.386877	0.335311	0.277812	0.243741	16.575	39.1059	0.123426	0.506382	16.197	95.7	96.9	45.2	22.1	29	34.5	18.3
245	oranges	Orangen	Orangen	2	1.733	0.72	0.14	6.62	34	1	3.5	560	9.705	4.032	0.784	37.072	190.4	0.529425	0.36235	0.108225	0.366041	38.806	40.4372	0.053963	0.147423	15.1119	100	100	69	39.1	26.1	71.3	45.5
246	red paprika peppers	Paprika rot	Paprika rot	3	3.6	1.3	0.5	6.4	37	1	3	500	18	6.5	2.5	32	185	0.622617	0.247241	0.130142	0.342711	52.1878	51.8556	0.0753148	0.219762	14.8274	99.9	100	62.1	35.2	29.4	60.8	36.5
247	green paprika peppers	Paprika gruen	Paprika gruen	3	2	1.17	0.3	2.91	20	1	1.5	250	5	2.925	0.75	7.275	50	0.338129	0.442955	0.218916	0.252411	41.2253	73.1059	0.0586296	0.232278	15.3829	99.9	99.4	54.1	31.2	26.4	50.6	32.9
248	blueberries	Heidelbeeren	Heidelbeeren	2	3.95	0.6	0.6	7.3	41	1	60	60	2.37	0.36	0.36	4.38	24.6	0.309264	0.319224	0.371512	0.232289	30.3124	75.4621	0.0692222	0.298001	15.7372	99.5	98.8	64.9	37.3	29.3	68.9	39.4
249	cauliflower	Blumenkohl	Blumenkohl	3	2.65	1.52	0.17	1.45	14	1	1	1900	50.35	28.88	3.23	27.55	266	0.380064	0.403038	0.216898	0.275848	28.3516	51.4317	0.085463	0.309819	15.5632	96.3	98.6	58.1	22.6	33.4	54.7	29.3
250	broccoli	Brokkoli	Brokkoli	3	3	2.15	0.13	1.63	17	1	1	500	15	10.75	0.65	8.15	85	0.335136	0.442017	0.222847	0.195919	27.2952	61.3451	0.0691852	0.353132	16.81	100	100	64.5	29.4	28.1	61.5	35.7
251	chinese cabbage	Chinakohl	Chinakohl	3	1.9	0.93	0.23	0.93	11	1	1	1300	24.7	12.09	2.99	12.09	143	0.38701	0.424183	0.188806	0.273037	27.567	42.2333	0.0954259	0.349498	15.3923	93	95.6	56.1	21.7	21.5	51.9	26.4
252	lettuce (iceberg)	Eisbergsalat	Salatkopf	3	1.567	0.8	0.16	1.26	11	1	1	300	4.701	2.4	0.48	3.78	33	0.373644	0.405026	0.22133	0.234207	20.787	39.1454	0.0649444	0.277295	15.747	98.8	99.2	55.7	24.1	24.9	51.5	29.7
253	pickles	Essiggurken	Gurken klein	3	0.867	0.64	0.18	1.82	16	1	5	225	1.951	1.44	0.405	4.095	36	0.359045	0.478141	0.162813	0.265933	31.7188	57.5782	0.0521667	0.196164	16.0684	96.4	98.5	55.8	31.6	25.4	56.2	31.4
254	figs	Feigen	Feigen	2	2.5	1.29	0.49	12.77	62	2	2	120	3	1.548	0.588	15.324	74.4	0.58681	0.222155	0.191035	0.198826	33.0445	63.153	0.0407593	0.205	16.0835	83.9	85.8	55.6	30.1	35.4	52	33.5
255	pomegranate	Granatapfel	Granatapfel	2	2.2	0.24	0.21	5.84	27	1	1.3	150	3.3	0.36	0.315	8.76	40.5	0.637817	0.212212	0.149972	0.151026	21.1227	55.1157	0.0313519	0.207593	15.9056	83.7	86.8	57.3	35.3	38.1	54.2	35.1
256	grapefruit	Grapefruit	Grapefruit	2	1.4	0.4	0.1	5.91	33	1	2	500	7	2	0.5	29.55	165	0.64809	0.247316	0.104594	0.34183	40.206	55.4282	0.0688889	0.20153	16.0623	100	99.8	54.3	32.8	31.4	54.1	33.6
257	lettuce (lollo rosso)	Salat LolloRosso	Salat LolloRosso	3	1.8	0.8	0.2	1.3	21	1	1	300	5.4	2.4	0.6	3.9	63	0.511291	0.250541	0.238168	0.29753	50.2928	54.7424	0.0907778	0.305105	17.1606	91.2	96.2	56.9	30.4	34.1	51	30.9
258	radishes	Radieschen	Radieschen	3	1.6	0.66	0.09	1.34	9	1	3.5	60	0.96	0.396	0.054	0.804	5.4	0.408984	0.358858	0.232158	0.184967	17.071	64.7917	0.0707963	0.382752	15.7062	100	97.6	56.6	28.9	28.6	54.1	32
259	red cabbage	Rotkraut	Rotkraut	3	2.75	1.17	0.14	2.76	18	1	1	1600	44	18.72	2.24	44.16	288	0.453021	0.221877	0.325102	0.45387	53.7242	81.4845	0.183722	0.40479	18.2612	95.2	99.5	51.7	26.1	36.6	49	22.2
260	asparagus	Spargel	Spargel gruen	3	1.4	1.33	0.1	1.43	12	1	3	150	2.1	1.995	0.15	2.145	18	0.46281	0.408755	0.128434	0.156544	26.7413	69.0709	0.0542778	0.346724	15.5488	99	99.7	50.5	25.7	27.2	51.5	22
261	soybean sprouts	Sojasprossen	Sojasprossen	3	2.4	5.3	1.2	4.68	52	2	60	80	1.92	4.24	0.96	3.744	41.6	0.375067	0.346901	0.278031	0.284267	12.8576	26.0605	0.135463	0.476535	15.1456	88.8	93.7	50.5	23.7	25.6	46.5	23.4
262	celery	Staudensellerie	Staudensellerie	3	2.3	0.76	0.13	1.37	11	1	1	300	6.9	2.28	0.39	4.11	33	0.356379	0.438419	0.205202	0.254296	24.8598	50.61	0.100593	0.395572	15.5463	93.6	89.1	49.6	26.3	31.1	39	21.6
263	mushrooms (brown)	Champignons braun	Champignons braun	3	2.067	2.19	0.19	0.45	12	1	8	118	2.439	2.5842	0.2242	0.531	14.16	0.480227	0.316915	0.202858	0.256874	31.6627	55.7148	0.0815185	0.317348	15.8261	99.4	100	56.3	25.9	27.6	54.3	24.8
264	mushrooms (white)	Champignons weiß	Champignons weiss	3	1.9	2.19	0.19	0.45	12	1	2	33.3	0.633	0.72927	0.06327	0.14985	3.996	0.370219	0.337932	0.291849	0.155267	4.94227	22.9319	0.0432407	0.278493	15.1243	98	99.8	54.8	29.4	24.3	55.6	27.5
265	zucchini	Zucchini	Zucchini	3	1.05	1.36	0.34	1.74	16	1	1.1	130	1.365	1.768	0.442	2.262	20.8	0.366493	0.37766	0.255847	0.188693	21.8911	67.5687	0.0353889	0.187548	16.2034	99.9	100	61.4	30.4	28.7	57.9	31.6
266	green onion (shallot)	Fruehlingszwiebeln	Fruehlingszwiebeln	3	2.8	0.9	0.3	8.5	42	1	3	105	2.94	0.945	0.315	8.925	44.1	0.36552	0.390989	0.243491	0.1937	18.7627	53.9836	0.0705741	0.364347	13.737	98.3	94.8	53.8	26.1	28.5	50	16.2
267	cucumber with slices	Gurke mit Scheiben	Gurke mit Scheiben	3	0.767	0.43	0.14	1.3	9	1	0.5	220	1.687	0.946	0.308	2.86	19.8	0.292041	0.482672	0.225287	0.17957	24.6446	73.5894	0.0454259	0.25297	15.3451	100	100	58.7	29.1	22.1	54.9	29.2
268	kohlrabi	Kohlrabi	Kohlrabi	3	1.4	1.3	0.07	2.4	16	1	1.5	536	7.504	6.968	0.3752	12.864	85.76	0.375645	0.423199	0.201156	0.242752	19.0891	47.318	0.0581667	0.239614	15.8518	84	81.2	49.7	19.3	26.1	43.8	19.6
269	limes	Limetten	Limetten	2	1	0.39	1.85	1.46	36	1	3	249	2.49	0.9711	4.6065	3.6354	89.64	0.401889	0.451007	0.147104	0.24513	24.7581	55.5813	0.0434074	0.177079	14.7501	100	99.9	58.5	31.4	25.8	54.6	25.6
270	corn (on a cob)	Mais	Mais	5	2.8	2.7	1.5	10.4	67	2	2	580	16.24	15.66	8.7	60.32	388.6	0.395548	0.39551	0.208942	0.270919	24.2008	47.6502	0.0588889	0.217368	14.8344	99.7	99.7	56.9	34.6	36.7	60.1	36.5
271	parsley	Petersilie	Petersilie	3	4.3	1.76	0.29	3.29	23	1	1	5	0.215	0.088	0.0145	0.1645	1.15	0.363836	0.416223	0.219941	0.121289	13.5519	58.2033	0.0460926	0.380023	16.0411	96.1	96.1	54.7	27	27.7	45.1	18.1
272	chives	Schnittlauch	Schnittlauch	3	4.225	3.58	0.6	1.6	27	1	100	30	1.267	1.074	0.18	0.48	8.1	0.284366	0.408693	0.306941	0.179678	24.6424	61.1379	0.0503519	0.280234	15.369	87.6	90.9	58.5	31.2	25.8	54.7	27.3
273	arugula	Salat Rucola	Salat Rucola	3	1.6	1	0.1	1.2	25	1	30	70	1.12	0.7	0.07	0.84	17.5	0.301332	0.417486	0.281182	0.244615	27.8737	74.9683	0.106778	0.436514	17.613	85.9	86.1	53.6	24.4	31.1	56.3	27.8
274	spinach	Spinat	Spinat	3	2.6	2.52	0.3	0.55	17	1	25	100	2.6	2.52	0.3	0.55	17	0.32607	0.476977	0.196953	0.299956	31.0472	39.0148	0.0937778	0.312639	15.5981	88.5	95.2	61.6	27	24.4	59.8	31.3
275	tomatoes	Tomaten	Tomate	3	1.2	0.9	0.2	2.47	16	1	3.5	455	5.46	4.095	0.91	11.2385	72.8	0.543089	0.26392	0.192991	0.381193	40.0841	50.6899	0.0955	0.25053	14.6298	99.1	100	64.9	38.7	26.6	65.5	38.3
276	lemons	Zitronen	Zitronen	2	1.767	0.45	0.38	5.17	36	1	1.8	262.5	4.638	1.18125	0.9975	13.5712	94.5	0.445216	0.401044	0.153741	0.362689	21.8788	25.562	0.0744815	0.205359	13.4665	99.9	99.9	61.2	35.3	21.6	51.7	26.2
277	fennel	Fenchel	Fenchel	3	2.625	2.26	0.28	2.64	23	1	1	130	3.413	2.938	0.364	3.432	29.9	0.37334	0.392348	0.234312	0.29113	24.6938	57.8438	0.0750741	0.257872	16.0524	91.8	85.9	48.1	27.9	33.4	43.7	22.6
278	fennel	Fenchel	Fenchel	3	2.625	2.26	0.28	2.64	23	1	1	130	3.413	2.938	0.364	3.432	29.9	0.355165	0.372038	0.272796	0.148319	10.5422	47.6845	0.0435556	0.293662	15.5403	88	81.3	45.9	24.9	31.2	41.7	18.3
279	sushi	Sushi	Sushi	10	1.367	5.2	1.7	28.9	162	2	4	65	0.889	3.38	1.105	18.785	105.3	0.379386	0.34628	0.274334	0.120044	14.5402	89.4332	0.0313704	0.261323	15.1057	97.9	97.1	37.4	27.2	39.1	38.9	22.3
280	cherries	Kirschen	Kirschen	2	1.8	1	0.3	13.3	63	2	6	60	1.08	0.6	0.18	7.98	37.8	0.559029	0.219921	0.22105	0.219344	37.0928	65.8275	0.0662778	0.302163	16.1426	100	100	71.5	42.9	27.9	76.1	56
281	grapes	Trauben	Trauben gruen	2	1.5	1	0.3	15.6	71	2	60	100	1.5	1	0.3	15.6	71	0.424322	0.452061	0.123617	0.174	15.2388	38.7538	0.0678519	0.389953	14.9603	99.2	100	70.9	36.6	27.4	74.9	48.8
282	banana	Banane	Bananen	2	2	1	0.12	14.3	64	2	1	200	4	2	0.24	28.6	128	0.428349	0.36503	0.206622	0.194026	12.4196	33.7231	0.0391481	0.201768	13.58	100	100	66.7	44.7	25.6	70.2	42.6
283	avocado	Avokado	Avocado	2	3.333	2	23.5	0.4	217	3	1	250	8.332	5	58.75	1	542.5	0.46381	0.401533	0.134658	0.335941	38.069	57.3141	0.0545185	0.162286	15.201	94	93.2	56.2	34.1	24.6	54.7	30.8
284	grapes	Trauben	Trauben rot	2	1.5	1	0.3	15.6	71	2	20	30	0.45	0.3	0.09	4.68	21.3	0.5205	0.266432	0.213068	0.277837	48.4708	46.8137	0.0549444	0.197758	16.3565	99.1	99.9	70	40.7	30.9	75.4	44.4
285	pineapple	Ananas	Ananas	2	1.4	0	0.08	7.1	32	1	1	1300	18.2	0	1.04	92.3	416	0.427642	0.353627	0.218731	0.158552	23.0244	57.8763	0.0642593	0.405289	16.8648	100	99.3	64.7	36.9	37.8	69.3	41.7
286	bar of chocolate	Tafel Schokolade	Schokolade Vollmilch	4	1.833	6.6	29.5	58.5	530	4	1	100	1.833	6.6	29.5	58.5	530	0.515831	0.312107	0.172062	0.275344	40.5641	37.061	0.0603148	0.219052	14.8819	100	100	58	29.8	24.6	63.3	31.3
287	chocolate (candy) bar	Schoko-Riegel	Schokoriegel	4	0.933	4.3	17.1	68.9	449	4	1	58	0.541	2.494	9.918	39.962	260.42	0.515228	0.307758	0.177014	0.182856	29.0335	39.0229	0.0382778	0.209333	15.5963	98.8	100	53.7	33.2	30.2	61.6	36.1
288	carrots	Karotten, gekocht	Karotten	3	3.1	1.24	0.16	7.51	36.75	1	50	80	2.48	0.992	0.128	6.008	29.4	0.547551	0.32558	0.126869	0.400604	39.5485	39.4472	0.0918333	0.229237	15.1442	94.1	97.5	60.4	28.6	38.3	60.4	25.7
289	chocolate cookies	Cookies	Schokokekse	4	3.233	5.5	21.1	67.3	471.1	4	4	55	1.778	3.025	11.605	37.015	259.105	0.51262	0.275627	0.211753	0.330896	57.0172	46.5142	0.0798704	0.241376	16.1667	87.8	97.6	51.5	35.2	30.8	61.1	39.1
290	bars of white chocolate	Schokoladentafeln weiß	Schokolade weiss	4	0.033	5	30.14	62.5	542	4	2	300	0.099	15	90.42	187.5	1626	0.407693	0.347524	0.244783	0.370615	23.3936	57.3618	0.108778	0.293506	13.0463	95.3	95.3	57.2	35.6	31.9	60.1	32.8
291	chocolate truffle	Praline	Praline	4	1.433	4	32.21	53.5	519	4	1	11	0.158	0.44	3.5431	5.885	57.09	0.46826	0.299547	0.232194	0.0901407	12.3226	40.5645	0.0285926	0.317199	14.4883	86.1	87.9	58.9	34.7	28.6	65.2	43.9
292	bread roll	Baguettebroetchen	Broetchen	5	3.133	8.9	0.7	51.4	253	3	1	60	1.88	5.34	0.42	30.84	151.8	0.422996	0.33763	0.239374	0.171167	14.4222	32.4054	0.0403704	0.235854	14.9928	99.8	100	53.5	25.4	24.2	59.3	29.2
293	KitKat (chocolate wafer bars)	Kitkat	Kitkat	4	1.767	6.97	25.58	65.11	488	4	3	15	0.265	1.0455	3.837	9.7665	73.2	0.512062	0.298774	0.189164	0.190956	24.4948	69.6543	0.0446852	0.234008	15.0492	99.4	97.8	55.1	36.7	34	66.7	39.4
295	toblerone	Toblerone	Toblerone	4	2.2	5.4	29	60	525	4	1	37.5	0.825	2.025	10.875	22.5	196.875	0.515264	0.282046	0.202689	0.107911	18.8463	53.703	0.0215556	0.199753	14.4279	97.2	97.2	52.4	36	28.9	63.8	37.7
296	colored chocolate beans	Bunte Schokolinsen	m&ms	4	1.933	4.18	20.88	70.98	501	4	30	35	0.677	1.463	7.308	24.843	175.35	0.416928	0.38289	0.200181	0.22293	31.2391	65.4923	0.0472593	0.211992	14.4595	97.4	98.1	50.5	36.4	31.1	57.2	35.8
297	m&ms (peanut)	m&ms (Erdnuss)	m&ms	4	3.325	10.14	26.36	60.85	507	4	7	14	0.466	1.4196	3.6904	8.519	70.98	0.455214	0.319355	0.225431	0.197111	19.3972	74.0477	0.0411852	0.208944	15.8601	96.7	98.2	43.3	26.1	31.7	50	28.3
298	cookies (oreos)	cookies Oreos	Oreos	4	2.633	2.94	20.58	73.52	470	4	1	11.33	0.298	0.333102	2.33171	8.32982	53.251	0.440659	0.29462	0.264721	0.207604	40.6677	56.3264	0.0285185	0.13737	16.0676	99.6	97.2	47.6	34.3	24.5	53.2	30.5
299	mixed vegetables	Gemuesemix	Gemuesemix gekocht	3	3.8	3.53	0.38	5	39	1	70	380	14.44	13.414	1.444	19	148.2	0.451456	0.462484	0.0860598	0.422681	60.313	51.9821	0.112852	0.26699	16.0043	98.1	99.4	60.7	36.8	48.7	63.9	32.3
300	loaf of bread	Laib Brot	Weissbrot	5	2.567	7	3.34	47.7	253	3	1	500	12.835	35	16.7	238.5	1265	0.449729	0.337398	0.212872	0.351719	28.5769	55.3176	0.0573889	0.163167	14.5191	99.9	100	48.2	27.7	26.6	49.4	25.3
301	roasted chicken	Gegrilltes Huhn	Gegrilltes Haehnchen	6	0	22	6.1	0	140	2	2	300	0	66	18.3	0	420	0.510579	0.306915	0.182506	0.477193	57.7612	57.4984	0.184556	0.386753	15.8722	93.6	97.1	45.4	30.8	28.1	54.1	34.6
302	fish sticks	Fischstaebchen	Fischstaebchen	7	0.8	14	8.78	14.1	193	2	6	180	1.44	25.2	15.804	25.38	347.4	0.562253	0.319101	0.118646	0.410759	39.0652	31.5011	0.0848704	0.206618	15.374	96.1	97.1	38.1	23.7	26.7	41.1	21.2
303	cauliflower	Blumenkohl, gekocht	Blumenkohl	3	2.433	2.46	0.28	2.34	23	1	7	50	1.216	1.23	0.14	1.17	11.5	0.41858	0.391617	0.189802	0.387726	34.2513	50.873	0.0576852	0.148778	15.315	95.6	99.5	56.7	23.4	29	52.5	23.5
304	potato gratin	Kartoffelauflauf	Kartoffelauflauf	10	1.25	2	5.7	11.2	107	2	1	400	5	8	22.8	44.8	428	0.43139	0.365884	0.202726	0.4697	25.6168	36.8425	0.127778	0.272041	15.8853	89.8	92.9	60.2	36.2	43.1	69.2	41.6
305	peas, corn and potatos	Erbsen, Mais, Kartoffeln	Erbsen gekocht	3	3.45	3.7	0.54	14.07	77.77	2	134	90	3.105	3.33	0.486	12.663	69.993	0.351478	0.483765	0.164757	0.33793	46.2994	52.0201	0.118648	0.351103	16.2103	94.6	97.7	55.6	30.7	36.2	57.9	31.2
307	salmon	Lachs (gegrillt)	Lachs (gegrillt)	7	0	20	9.57	1.3	170	2	1	125	0	25	11.9625	1.625	212.5	0.453041	0.342409	0.20455	0.252996	21.3054	40.9617	0.0745741	0.294764	15.7711	96.9	96.9	49.9	27.4	31.2	54.2	28.4
308	salmon sushi	Lachs Sushi	Lachs Sushi	10	0.2	17.6	2.3	35.5	233	3	1	30	0.06	5.28	0.69	10.65	69.9	0.491552	0.303455	0.204993	0.33277	25.9127	34.0844	0.0747778	0.224713	14.9822	85.6	88.7	44.5	30.1	33.8	46.7	28.7
309	Wiener schnitzel	Wiener Schnitzel	Wiener Schnitzel	6	0.867	18	7.61	17.3	211	3	2	300	2.601	54	22.83	51.9	633	0.51351	0.327351	0.159139	0.314078	31.7063	49.9357	0.0833148	0.265268	15.0826	86.9	95.4	42.3	29.1	31.5	48.1	27.9
310	pasta with bacon	Spaghetti mit Speck	Spaghetti mit Speck	10	2.667	14.07	3.92	52.46	306	3	1	65	1.734	9.1455	2.548	34.099	198.9	0.493716	0.335826	0.170458	0.460289	35.4051	46.4633	0.147204	0.319807	15.4389	95.3	99.2	48.1	32	37.7	55.4	36.6
311	Roast Beef	Roast Beef	Roast Beef	6	0	21	4	0	121	2	1	200	0	42	8	0	242	0.518704	0.276887	0.204409	0.350341	59.3263	48.9431	0.0864074	0.246638	16.1341	100	100	56	41.2	33.3	60.6	39.4
312	chicken fillets, grilled	Haehnchenfilet, gegrillte	Haehnchenfilet gegrillt auf Salat	10	0.08	13.24	1.45	4	82.55	2	4	235	0.188	31.114	3.4075	9.4	193.993	0.394155	0.334386	0.271459	0.445467	23.8961	58.1944	0.0982407	0.220534	15.9395	73	93.9	50.9	33.9	44.3	53.8	29.5
313	strawberry ice cream cone	Erdbeereistuete	Erdbeereis Waffel	4	0.633	2.72	9.78	39.13	255.43	3	1	92	0.582	2.5024	8.9976	35.9996	234.996	0.516725	0.27122	0.212056	0.161563	19.7762	57.6361	0.0625926	0.387419	14.4574	100	99.7	54.3	36.7	33.4	62.5	41.5
314	shashlik with baked potato	Schaschlik mit Backkartoffel	Schaschlik mit Backkartoffel	10	1.117	6.4	1.62	10.57	93.83	2	2	320	3.574	20.48	5.184	33.824	300.256	0.533788	0.284683	0.181529	0.353544	37.8407	68.9871	0.108685	0.307416	17.3706	84.2	93.1	53.1	33.9	49	57.3	36.8
315	shashlik	Schaschlik	Schaschlik	10	0.467	13.73	4.16	2.35	130.22	2	2	120	0.56	16.476	4.992	2.82	156.264	0.614123	0.271365	0.114512	0.331526	42.7537	57.005	0.0866111	0.26125	16.174	75	87.3	50	34.4	51.6	54	34.5
316	spinach-potatoe casserole	Spinat-kartoffelauflauf	Spinat-kartoffelauflauf	10	1.857	3.9	4.1	11	97	2	1	400	7.428	15.6	16.4	44	388	0.375066	0.352917	0.272017	0.39797	28.7686	58.1078	0.106833	0.268445	17.0228	87.8	91.2	55	35.8	46.2	60.2	35.8
317	Potatoe Wedges	Kartoffelecken	Kartoffelecken	10	2.475	2.7	2.2	25.5	123	2	31	150	3.712	4.05	3.3	38.25	184.5	0.487389	0.356051	0.15656	0.470648	53.913	56.1647	0.166704	0.3542	14.9244	96.8	100	66.8	45.8	39.3	76.6	50.3
318	fried sausage with roll	Bratwurst im Broetchen	Bratwurst im Broetchen	10	0.787	12.6	18.2	9.2	248	3	3	197	1.55	24.822	35.854	18.124	488.56	0.48746	0.309831	0.202709	0.245152	27.4628	58.6295	0.0796852	0.325044	16.5167	96.5	95.1	38.9	26.6	29.4	41.5	25.6
319	canard , roasted	Ente, gebraten	Ente, gebraten	6	0	18.2	17.2	0	248	3	1	2000	0	364	344	0	4960	0.548468	0.284636	0.166896	0.29357	38.1754	50.9313	0.0833889	0.284051	16.7136	94.8	97.6	46.6	30.6	36.2	57.3	28.9
320	Crème Brûlée	Crème Brûlée	Creme Bruelee	4	0	2.8	15.2	17.8	219	3	1	125	0	3.5	19	22.25	273.75	0.4473	0.350472	0.202228	0.349837	24.6196	37.0015	0.107296	0.306704	15.2266	49.4	57.4	47.6	28.9	34.3	49.6	31.8
321	egg, boiled	Ei im Becher, gekocht	Ei im Becher	1	0	13	11.1	0.7	154	2	1	50	0	6.5	5.55	0.35	77	0.39421	0.337183	0.268607	0.296426	17.4056	36.8434	0.0465926	0.157181	12.6643	98.2	99	50	24.6	30.1	51.9	24.4
322	knuckle of pork with sauerkraut	Eisbein mit Sauerkraut	Eisbein mit Sauerkraut	10	0.843	15.32	6	3.43	135	2	2	850	7.165	130.22	51	29.155	1147.5	0.499441	0.334101	0.166458	0.500896	54.4842	52.7603	0.163926	0.327265	16.3986	47.7	71.7	32.4	21.7	48.5	31.2	11
323	trout with potatoes, pan fried	Forelle mit Kartoffel, gebraten	Forelle mit Kartoffel, gebraten	7	0	14.35	5.84	5.17	132.63	2	3	377	0	54.0995	22.0168	19.4909	500.015	0.467188	0.368206	0.164606	0.278359	33.9859	65.2396	0.0775741	0.278683	17.2564	97.2	99.4	46.3	25	36.6	43.5	22.9
324	rissole	Bulette	Frikadelle	6	0.7	21.7	16.1	4.5	249	3	1	150	1.05	32.55	24.15	6.75	373.5	0.507009	0.296994	0.195997	0.48093	66.4599	43.9575	0.144278	0.299998	16.6185	72.3	79.7	38.9	21.2	28.8	39.9	16.9
325	fruit salad	Obstsalat	Obstsalat	2	1.967	0.6	0.3	11.6	53	2	1	150	2.95	0.9	0.45	17.4	79.5	0.459894	0.35619	0.183916	0.446504	46.7929	59.9568	0.122056	0.273358	14.8298	99.4	100	80.5	56.4	57.1	83.6	67.2
326	Hot Dog	Wuerstchen mit Kraut im Broetche	Wuerstchen mit Kraut im Broetchen	10	1.81	8.92	9.57	26.23	226.4	3	5	137.5	2.489	12.265	13.1587	36.0662	311.3	0.52518	0.324198	0.150622	0.378011	40.716	53.4776	0.103611	0.274095	16.1587	100	99.3	40.5	27.7	36.8	41.3	26.9
327	mashed potatoes	Kartoffelbrei	Kartoffelbrei	10	3.133	2.06	2.49	11.45	78	2	2	225	7.049	4.635	5.6025	25.7625	175.5	0.425205	0.38918	0.185615	0.566819	30.3207	46.4678	0.0832778	0.146921	15.6377	77.1	89.7	48.3	28.6	27.1	54.2	27.9
328	fillet of pork, grilled	Schweinefilet, gegrillt	Schweinefilet, gegrillt	6	0	18.95	5.72	1.42	172.48	2	7	315	0	59.6925	18.018	4.473	543.312	0.587643	0.268989	0.143368	0.372952	52.9556	66.1507	0.113889	0.305372	16.8931	93.8	94.5	44.2	28.4	32.9	48.9	30.2
329	salmon	Lachs	Lachs	7	0	19	13	0	193	2	1	50	0	9.5	6.5	0	96.5	0.628982	0.263151	0.107867	0.313144	35.0844	34.0463	0.0572778	0.182912	14.1135	98.2	99	58.8	38.1	27.4	62.3	38.4
330	latte macchiato	Latte macchiato	Latte macchiato	8	0.05	3	1	3	50	2	1	200	0.1	6	2	6	100	0.380053	0.337529	0.282419	0.277852	19.8598	67.1144	0.0519815	0.187083	15.7111	97.1	97.8	51.5	29.7	33.9	52.2	34.1
331	marble cake	Marmorkuchen	Ruehrkuchen	5	1.595	6.21	21.7	42.89	391	4	1	70	1.116	4.347	15.19	30.023	273.7	0.489121	0.322754	0.188125	0.461078	62.3886	74.2064	0.078463	0.170173	17.0735	94.6	92.9	50.1	31.8	36	55.7	29.9
332	mixed salad	gemischter Salat	Salatteller mit Paprika	10	1.3	1.16	0.14	1.74	13.74	1	1	230	2.99	2.668	0.322	4.002	31.602	0.459786	0.359874	0.18034	0.478181	45.8998	60.4373	0.142185	0.297346	16.4277	97.2	97.4	63.8	38.6	49.4	66.2	41.9
333	spring onions	Bund Fruehlingszwiebeln	Fruehlingszwiebeln	3	2.8	0.9	0.3	8.5	42	1	4	180	5.04	1.62	0.54	15.3	75.6	0.351651	0.431832	0.216517	0.155133	18.585	54.9281	0.0498519	0.321348	14.8807	97.6	97.6	52.8	19.8	22.9	51.3	17.2
334	carrots	Bund Karotten	Karotten	3	2.767	1.3	0.2	5.2	26	1	5	400	11.068	whole_food_complete	0.8	20.8	104	0.444643	0.420323	0.135034	0.230804	26.8602	54.3332	0.0771111	0.334098	16.9407	100	100	57	24.9	27	57.2	29.7
335	sugar snap pea	Zuckerschote	Zuckerschote	3	5	4.1	0.2	9.8	58	2	3	15	0.75	0.615	0.03	1.47	8.7	0.367255	0.509077	0.123668	0.228541	28.2641	36.7017	0.0477593	0.208975	15.3001	97.7	97.7	57.7	29.1	27	58.9	29.8
336	black licorice wheels	Lakritzschnecken	Lakritzschnecken	4	1.133	4.31	0.9	86.16	375	4	3	20	0.227	0.862	0.18	17.232	75	0.260094	0.28494	0.454966	0.384044	73.1673	57.482	0.130926	0.340913	16.9073	77.9	78.6	32.9	17.4	26.2	25.2	12.3
337	meat fillets and vegetables, grilled	Filet und Gemuese, gegrillt	Filet und Gemuese, gegrillt	10	1.233	10.78	3.17	3.31	106.86	2	7	300	3.699	32.34	9.51	9.93	320.58	0.421761	0.335405	0.242834	0.443337	35.9447	69.142	0.128148	0.289054	17.2888	97.2	98.5	56.6	39.9	54.1	60.1	40.4
338	mixed licorice	Lakritzkonfekt	Gummibaerchen mit Lakritz	4	1.2	3.6	2.1	74.4	334	3	62	120	1.44	4.32	2.52	89.28	400.8	0.448471	0.284462	0.267067	0.392356	43.8411	89.2908	0.11437	0.291497	17.2567	90.2	87.1	37.4	26	40.5	35.8	15.7
339	wine gum	Weingummi	Gummibaerchen sauer	4	0	6	0	79	342	3	45	80	0	4.8	0	63.2	273.6	0.488864	0.290146	0.22099	0.341922	31.911	55.5924	0.0658889	0.192701	16.5379	96.5	96.7	48.2	30.9	40.2	50.1	30.2
340	gummi bears with extra sugar	Gummibaerchen mit Zucker	Gummibaerchen sauer	4	0	3.8	0	80	345	3	2	5	0	0.19	0	4	17.25	0.41934	0.322521	0.258139	0.359167	34.6073	45.9954	0.110056	0.306419	17.6129	99.3	100	50.2	36.3	35.8	52.1	31.4
341	banana	Bananen	Bananen	2	2	1.15	0.18	21.39	95	2	2	396	7.92	4.554	0.7128	84.7044	376.2	0.446113	0.378246	0.17564	0.292056	20.3385	37.3825	0.0454074	0.155475	14.9334	100	100	63.1	34.2	23.7	70.4	45
342	artichoke	Artischocken	Artischocke	3	10.8	2	0.12	2.6	22	1	3	750	81	15	0.9	19.5	165	0.390671	0.432199	0.17713	0.390115	54.5705	51.9933	0.119111	0.305323	17.4764	96.1	93.7	50.3	31.3	38.8	44.8	28.9
343	eggs in eggboard	Eier im Karton	Eier im Karton	1	0	13.1	11.2	0.6	155	2	12	840	0	110.04	94.08	5.04	1302	0.414325	0.328925	0.256751	0.491452	33.0701	36.8637	0.137444	0.27967	16.5151	100	100	50.3	22.1	24.9	46.7	23.8
344	brownie with nuts	Schokokuchen mit Nuessen	Brownie	4	2.75	4.9	26.33	52.76	470.72	4	3	72.4	1.991	3.5476	19.0629	38.1982	340.801	0.558116	0.292184	0.1497	0.392078	60.5607	52.5593	0.0905926	0.231058	16.6604	90.2	94.7	51.4	31.1	34.6	64.6	33.6
345	grapes, red and white	Weintrauben, rote und weiße	Trauben	2	1.5	0.7	0.3	15.6	71	2	204	640	9.6	4.48	1.92	99.84	454.4	0.526122	0.301394	0.172484	0.289444	44.3529	60.3519	0.0737963	0.254958	16.5844	99.6	100	66	43.3	29.6	75.2	51.2
346	potatoes	Kartoffeln	Kartoffeln	3	2.167	2	0.11	14.8	71	2	4	600	13.002	12	0.66	88.8	426	0.579909	0.293029	0.127062	0.377785	50.8587	42.3973	0.0514444	0.136174	16.367	99.9	100	59	26.1	16.7	62.3	30.6
347	toast with jam	Toast mit Erdbeermarmelade	Toast mit Erdbeermarmelade	10	2.467	3.7	1.66	54.8	248.5	3	1	50	1.234	1.85	0.83	27.4	124.25	0.726646	0.174448	0.0989067	0.399026	62.2717	58.6067	0.0758148	0.19	15.7798	100	100	45.7	27.7	26.3	52.4	26.4
348	rusk	Zwieback	Zwieback	5	3.167	9.19	4.3	71.41	365	4	1	10	0.317	0.919	0.43	7.141	36.5	0.5229	0.352019	0.12508	0.426896	52.9685	37.5981	0.0503519	0.117949	16.8429	99.2	100	47	18.5	19.4	45.4	18.9
349	corn flakes with milk	Corn Flakes mit Milch	Corn Flakes	5	2.367	4.2	2.8	25.4	142	2	1	200	4.734	8.4	5.6	50.8	284	0.447438	0.322554	0.230008	0.33917	39.6879	58.9938	0.113981	0.33606	16.8686	99.6	94.6	47.5	26	35.9	45.9	23.6
350	quiche	Quiche	Quiche	10	0.667	9.3	26.1	12.8	321	3	1	800	5.336	74.4	208.8	102.4	2568	0.541121	0.32852	0.130358	0.523926	65.1117	47.7771	0.132167	0.252262	16.4174	84.3	87.7	48.5	30.9	42.3	54.3	27.4
351	croissant	Croissant	Croissants	5	2.175	7.08	33.57	44.86	508	4	1	65	1.414	4.602	21.8205	29.159	330.2	0.57747	0.319699	0.102831	0.340856	44.4635	34.7173	0.0568519	0.166792	15.9566	97.9	94.2	57.8	32.4	31.7	63.3	36.5
352	baguette	Baguette	Baguette	5	3.133	7.3	0.7	51.5	245	3	1	900	28.197	65.7	6.3	463.5	2205	0.533601	0.331481	0.134918	0.229078	25.9233	42.73	0.0521296	0.227563	16.4268	100	100	55.9	29.1	23.7	60.3	29.9
353	strawberry tartlet	Erdbeertoertchen	Erdbeertartelette	5	1.575	1.6	1.4	20.6	104	2	1	107	1.685	1.712	1.498	22.042	111.28	0.660404	0.214262	0.125334	0.456326	69.8672	43.9668	0.0738519	0.16184	15.9626	98.1	94.3	55.5	38.9	33.5	66.2	41.5
354	blueberry a. strawberry tartlet	Heidelbeer-Erdbeertoertchen	Heidelbeer-Himbeertoertchen	5	1.867	2.12	6.43	18.4	217.54	3	1	65	1.214	1.378	4.1795	11.96	141.401	0.507832	0.28491	0.207258	0.429289	64.457	51.3995	0.099463	0.231692	16.263	97	95.7	53.5	31	47.7	57.7	38.8
355	cream cake with fruits	Sahnetorte mit Fruechten	Obsttorte	5	0.667	3.1	8.9	29.2	212	3	1	1250	8.338	38.75	111.25	365	2650	0.479974	0.327604	0.192422	0.485607	49.2557	66.3909	0.162352	0.334327	17.1595	93.2	94.8	51.2	34.4	53.2	59.1	35.1
356	sprouts, potatoes, carrots	Rosenkohl mit Kartoffeln und Moehren	Rosenkohl	3	4.167	3.1	0.23	8.3	49.7	2	25	430	17.918	13.33	0.989	35.69	213.71	0.37139	0.433945	0.194665	0.377193	45.7918	52.2768	0.0952037	0.252401	15.6278	97.4	97.5	48.4	23.8	36.5	47	21.2
357	Black Forest cake	Schwarzwaelder Kirschtorte	Schwarzwaelder Kirschtorte	5	1	3	15	38	334	3	1	1080	10.8	32.4	162	410.4	3607.2	0.493098	0.288135	0.218766	0.314093	44.5584	66.4362	0.0595556	0.189611	17.3953	99.7	99.5	52.5	35.9	43	60.2	39.4
358	glass of orange juice	Glas mit Orangensaft	Glas mit Orangensaft	8	0.033	1	0	9	45	1	1	250	0.082	2.5	0	22.5	112.5	0.466119	0.367149	0.166732	0.215941	14.1773	38.4678	0.0318519	0.147503	14.6696	99.1	100	58.9	30.9	18.6	64.2	42.5
359	green asparagus	Bund gruener Spargel	Spargel gruen	3	1.4	1.33	0.1	1.43	12	1	15	1000	14	13.3	1	14.3	120	0.445075	0.421705	0.13322	0.170452	22.0647	47.3193	0.0790926	0.464017	15.3022	99.8	99.4	56.8	32.7	28.5	58.8	30.9
360	artichoke	Artischocke	Artischocke	3	10.8	2	0.12	2.6	22	1	1	250	27	5	0.3	6.5	55	0.443057	0.459708	0.0972354	0.402289	54.5218	37.1922	0.0802222	0.199414	16.2169	89.7	91.2	49.5	28.4	31.8	42.8	22.3
361	carrots, cooked	Karotten, gekocht	Karotten	3	3.033	1.3	0.2	5.2	26	1	1	150	4.55	1.95	0.3	7.8	39	0.579967	0.306743	0.11329	0.416737	48.6619	33.442	0.0861852	0.20681	15.0823	96.9	97.4	54.4	32.2	25.3	56.3	34.5
362	beans and carrots, cooked	Bohnen & Karotten gekocht	Bohnen & Karotten gekocht	3	2.575	2	0.2	3.1	25	1	35	120	3.09	2.4	0.24	3.72	30	0.481275	0.361828	0.156897	0.375422	58.6788	47.3626	0.118685	0.316138	16.0457	97.5	99.7	58.6	26.8	31.9	58.3	33.6
363	chips / French fries	Pommes frites	Pommes Frites	10	3.075	6	13	44	291	3	37	200	6.15	12	26	88	582	0.4199	0.338559	0.241541	0.44557	22.9108	49.9401	0.109889	0.246625	15.3018	100	100	49.6	34.1	25.3	55.4	34.1
364	green beans	gruene Bohnen	gruene Bohnen	3	2.55	1.7	0.1	4.7	27	1	16	80	2.04	1.36	0.08	3.76	21.6	0.401111	0.490419	0.10847	0.267107	29.738	43.5843	0.12413	0.464718	15.632	99.1	99.7	60.2	30.4	28.8	59.4	28
365	orange	Orange	Orangen	2	1.733	0.72	0.14	6.62	34	1	1	340	5.892	2.448	0.476	22.508	115.6	0.517192	0.345522	0.137286	0.34967	26.1519	24.0889	0.0368704	0.105443	15.0511	100	100	63.4	37.7	23	67.2	41.2
366	bagels with sesame and poppy seed	Mohn und Sesambagel	Bagel	5	3.9	11.38	3.92	50.4	276.1	3	2	180	7.02	20.484	7.056	90.72	496.98	0.49185	0.322505	0.185645	0.399904	43.438	59.5912	0.11713	0.292895	17.9905	99.9	96.8	52.5	31.2	29.6	56.5	32.5
367	zucchini	Zucchini	Zucchini	3	1.05	1.6	0.4	2.05	19	1	2	400	4.2	6.4	1.6	8.2	76	0.301752	0.422724	0.275524	0.271104	40.597	59.5461	0.0676852	0.249665	17.9162	98.4	99.6	51.8	26.9	20.8	51.9	25.4
368	chiccory	Chicorée	Chicoree	3	1.2	1.14	0.16	2.06	15	1	4	700	8.4	7.98	1.12	14.42	105	0.383363	0.374022	0.242614	0.340574	13.3871	33.2597	0.0368148	0.108096	15.4543	77.1	76	46.6	23.2	30.9	38	15.5
369	sushi roll with cucumber	Sushirolle mit Gurke	Sushi	10	1.233	24.6	0.2	22	100	2	2	40	0.493	9.84	0.08	8.8	40	0.374554	0.308484	0.316962	0.287222	34.0186	86.2423	0.0667593	0.232431	16.7837	90.8	94.8	50.6	36.6	45.4	48.6	35.1
370	mixed vegetables	Gemuesemix, gekocht	Gemuesemix gekocht	3	2.833	3.24	0.5	11.5	64.6	2	1	120	3.4	3.888	0.6	13.8	77.52	0.394002	0.451086	0.154913	0.286263	36.9974	57.9781	0.0918704	0.32093	16.5153	99.4	100	57.1	31.2	39.1	57.8	30.5
371	sushi with salmon	Sushi with Lachs	Lachs Sushi	10	0.267	9	2.1	37	172	2	1	35	0.093	3.15	0.735	12.95	60.2	0.544149	0.310913	0.144938	0.378559	33.7551	24.7125	0.072463	0.191418	16.1747	85	94.6	49.6	32.6	28.3	53.1	28.9
372	breakfast cereals	Fruehstuecksflocken	Fruehstueckskringel	5	5.025	9	3.5	74	381	4	1	40	2.01	3.6	1.4	29.6	152.4	0.449357	0.353159	0.197485	0.4333	25.9071	49.105	0.14937	0.344727	16.8554	96.8	97.4	40	24	27.8	43.1	25.1
373	vanilla ice cream	Vanilleeistuete	Vanilleeis Waffel	4	0.233	3.13	11	25	211	3	1	64	0.149	2.0032	7.04	16	135.04	0.43106	0.361139	0.207801	0.147019	11.709	56.3839	0.0375741	0.255574	14.3179	98.6	100	52.4	38.9	27.8	65.7	40
374	doughnut / donut icing	Krapfen mit Glasur	Krapfen mit Glasur	5	2.167	6.2	13.5	45.8	318	3	1	65	1.409	4.03	8.775	29.77	206.7	0.460667	0.337372	0.201961	0.459193	41.3045	56.9769	0.0981852	0.213821	15.9997	98.8	98.8	49.6	28.9	31.2	58.3	30.4
375	doughnut / donut jam	Krapfen mit Marmelade	Krapfen mit Glasur	5	2.167	5.6	30.6	44.8	478	4	1	74	1.604	4.144	22.644	33.152	353.72	0.448289	0.332686	0.219025	0.447367	36.6899	65.814	0.0685926	0.153325	15.7984	95.2	92	45.9	31.2	37.4	50	27.6
376	french cruller	Spritzkuchen	Spritzkuchen	5	0.433	5	9	29	215	3	1	70	0.303	3.5	6.3	20.3	150.5	0.523731	0.330009	0.14626	0.419604	45.4076	39.7186	0.0960556	0.22892	15.9491	77	80.7	44.1	29.5	35.9	45.5	25.7
377	doughnut / donut plain	Krapfen Donut	Donut Krapfen	5	1.567	8	19.7	45.9	395	4	1	60	0.94	4.8	11.82	27.54	237	0.538459	0.340969	0.120572	0.426911	42.2646	35.6782	0.0543148	0.127227	15.9604	97.7	100	48.8	29.1	20.7	55.6	31
378	ravioli	Ravioli	Ravioli	5	1.7	11.1	8	20.4	189	2	35	500	8.5	55.5	40	102	945	0.384425	0.344202	0.271374	0.443259	16.7992	36.1515	0.0828148	0.186832	14.9005	97	98.3	51.4	34.1	35	58	32.4
379	banana	Bananen	Bananen	2	2	1.15	0.18	21.39	95	2	3	594	11.88	6.831	1.0692	127.057	564.3	0.462049	0.40557	0.132381	0.325267	20.0696	42.5811	0.0537778	0.165334	15.5832	99.5	99.6	63.1	34.9	27.3	70.8	37.5
380	gherkin	Gewuerzgurke	Gewuerzgurke	3	0.467	0.64	0.18	1.82	16	1	1	30	0.14	0.192	0.054	0.546	4.8	0.450599	0.420296	0.129105	0.292289	42.6029	39.3546	0.0479444	0.164031	15.448	99.9	99.1	54.2	31.5	19.8	58.5	28
381	spaghetti	Spaghetti	Spaghetti	5	3.167	12.34	2.78	68.29	352	4	1	500	15.835	61.7	13.9	341.45	1760	0.531785	0.393601	0.0746142	0.30907	20.3207	33.8928	0.0745741	0.241285	14.2429	100	100	54.7	26.6	17.1	63	27.4
382	gherkin, sliced	Gewuerzgurke, geschnitten	Gewuerzgurke	3	0.467	0.64	0.18	1.82	16	1	1	25	0.117	0.16	0.045	0.455	4	0.452472	0.409884	0.137644	0.427515	40.2399	44.5873	0.0733704	0.171621	16.6147	88.1	99.5	48.8	28.7	31.2	54.6	34.2
383	ravioli	Ravioli	Ravioli	5	1.7	11.1	8	20.4	189	2	3	45	0.765	4.995	3.6	9.18	85.05	0.507541	0.341007	0.151452	0.4351	48.4105	49.4134	0.0462407	0.106276	15.6638	92.8	92.6	51	27.2	37	54.6	29.3
384	tortellini	Tortellini	Tortellini	5	1.9	13	6.4	48	180	2	40	250	4.75	32.5	16	120	450	0.437765	0.359915	0.20232	0.54453	48.5385	45.3159	0.150352	0.276113	16.5219	99.3	99.5	50.9	31.5	34.4	54.9	34.2
385	tagliatelle	Tagliatelle	Tagliatelle	5	3	4.1	2.1	33	170	2	1	250	7.5	10.25	5.25	82.5	425	0.38425	0.343699	0.27205	0.445585	16.8399	40.1048	0.106722	0.23951	16.0906	86.6	91	53.3	27	28.1	59.2	28.1
386	papaya	Papaya	Papaya	2	1.8	0.37	0.07	1.73	9	1	1	350	6.3	1.295	0.245	6.055	31.5	0.469747	0.407259	0.122994	0.321259	27.1797	35.085	0.0472037	0.146933	15.983	82.3	81.7	57.8	36.9	37.9	54.7	35.3
387	goose, roasted	Gans, gebraten	Gans, gebraten	10	0	15.7	31	0	338	3	1	3500	0	549.5	1085	0	11830	0.447106	0.311384	0.241511	0.467852	40.0786	74.2349	0.0888148	0.189835	16.349	99.4	99.3	51.8	36.1	50.1	61.7	35.3
388	glass of white wine	Glas Weißwein	Glas Weisswein	8	0	0.1	0	2.6	74	2	1	150	0	0.15	0	3.9	111	0.346047	0.340788	0.313166	0.159256	3.97148	27.0514	0.0295926	0.185818	15.1488	98.1	99.6	51.8	34.4	27.1	50.8	27.8
389	cantaloup	Melone	Melone	2	0.867	0.9	0.3	8.4	36	1	1	1200	10.404	10.8	3.6	100.8	432	0.397077	0.36579	0.237133	0.392819	24.6972	46.0827	0.136611	0.347772	17.6389	97.3	98.4	57.8	35.1	35.4	63.1	41.8
390	glass of red wine	Glas Rotwein	Glas Rotwein	8	0	0.1	0	2.6	74	2	1	150	0	0.15	0	3.9	111	0.380257	0.303724	0.316019	0.152859	11.9422	84.9916	0.0140926	0.0921933	15.3358	100	100	51.6	36.5	26.1	50.3	30.5
391	red grapes	rote Weintrauben	Trauben rot	2	1.6	0.7	0.3	15.6	71	2	70	300	4.8	2.1	0.9	46.8	213	0.423895	0.283175	0.29293	0.316622	52.2652	54.128	0.0956111	0.301972	17.079	98.8	97.6	64.6	38.8	26.4	71.4	48.9
392	mandarins	Mandarinen	Mandarinen	2	1.267	0.7	0.3	10.1	50	2	3	396	5.017	2.772	1.188	39.996	198	0.554683	0.367405	0.0779114	0.267644	21.9848	28.7033	0.0426296	0.159277	14.9802	96	98.1	55.1	28.1	23.6	58.1	29.1
393	honeydew melon	Honigmelone	Honigmelone	2	0.8	1	0.09	12.7	55	2	1.5	2000	16	20	1.8	254	1100	0.448774	0.393879	0.157347	0.464785	22.5641	34.0675	0.0691667	0.148814	15.7156	83.4	82.5	61.4	30.4	28.2	63.5	34.4
394	grape, whites	Weintrauben, weiß	Trauben rot	2	1.6	0.7	0.3	15.6	71	2	7	40	0.64	0.28	0.12	6.24	28.4	0.424695	0.407587	0.167718	0.412163	31.425	34.0268	0.0497778	0.120772	15.6267	100	99.9	66.8	41.7	27.6	77	55.5
395	head of cabbage	Kohlkopf	Wirsing	3	2.567	2.16	0.29	1.74	19	1	1	1100	28.237	23.76	3.19	19.14	209	0.314428	0.477313	0.208259	0.345819	41.1082	58.173	0.0689074	0.199259	17.5149	92.8	97.2	51.6	24.4	35.4	47.6	23.2
396	pears	Birnen	Birnen	2	2.467	0.5	0.3	12.4	52	2	1.5	300	7.401	1.5	0.9	37.2	156	0.490357	0.354639	0.155004	0.257563	19.3834	42.0773	0.0335926	0.130425	15.7564	97.8	99.1	64.5	34.8	29.9	69.2	45.4
397	grapes, red	Weintrauben, rot	Trauben	2	1.6	0.7	0.3	15.6	71	2	80	200	3.2	1.4	0.6	31.2	142	0.468194	0.248604	0.283202	0.302589	55.4296	54.6377	0.0920926	0.304349	16.7896	100	100	68.3	38.1	26.2	75.1	50.8
398	cherries	Kirschen	Kirschen	2	1.633	0.9	0.3	13.3	63	2	4	80	1.306	0.72	0.24	10.64	50.4	0.513204	0.219705	0.267092	0.219963	35.1368	56.3859	0.0677778	0.308133	15.8759	99.9	100	73.9	45.8	27.4	79.1	59.2
399	cherry	Kirsche	Kirschen	2	1.633	0.9	0.3	13.3	63	2	1	20	0.327	0.18	0.06	2.66	12.6	0.545159	0.210684	0.244157	0.105763	16.6042	66.593	0.0304074	0.287505	14.8661	100	100	69.5	45.2	20.2	76.2	53
400	éclair	Eclair	Eclair	5	0.733	5	15	40	294	3	1	160	1.173	8	24	64	470.4	0.537471	0.313152	0.149377	0.321185	39.7235	53.3853	0.0752407	0.23426	16.2072	92.6	89.5	38.6	24.2	35.7	43.3	23.6
401	red chilli	rote Pepperoni	rote Pepperoni	3	2	1.9	0.4	8.8	40	1	1	10	0.2	0.19	0.04	0.88	4	0.657612	0.212289	0.130099	0.100841	14.2589	53.0052	0.0298148	0.295662	15.1511	98.8	97.6	48.7	31.2	22.5	42.2	21.2
402	pear	Birne	Birnen	2	2.467	0.5	0.3	12.4	52	2	1	150	3.7	0.75	0.45	18.6	78	0.481613	0.329799	0.188589	0.278426	26.9182	30.8604	0.034037	0.122248	15.1525	99.4	99.7	61.5	35.1	24.3	66.3	45.6
403	pizza with mushrooms and bell pepper	Pizza mit Pilzen und Paprika	Pizza Salami	10	1.967	10	12	16	245	3	1	350	6.885	35	42	56	857.5	0.493045	0.303925	0.20303	0.466011	46.4727	60.9853	0.166944	0.358241	17.2947	99.7	99.9	53.3	32.6	48.6	54.1	30.7
404	apples	Aepfel	Aepfel	2	2.05	0.34	0	11.43	52	2	3	660	13.53	2.244	0	75.438	343.2	0.496038	0.316255	0.187707	0.423678	35.0126	56.9993	0.0870741	0.20552	15.4105	100	100	62.9	35.1	22.4	67.6	43
405	head of green lettuce	gruener Salatkopf	Salatkopf	3	1.333	2	0.2	1	12	1	1	300	3.999	6	0.6	3	36	0.3838	0.401925	0.214275	0.355044	30.5007	67.3694	0.113167	0.318739	17.4967	92.4	94.4	53.6	24.5	29.9	51.2	22.5
406	salmon with vegetables, grilled	Lachs mit Gemuese, gegrillt	Fisch mit Gemuese, gegrillt	10	1.4	9.42	5.58	6.76	116.52	2	1	325	4.55	30.615	18.135	21.97	378.69	0.403233	0.36716	0.229607	0.459374	37.7636	79.0506	0.114537	0.249333	17.392	73.7	91.5	55.2	38.2	66.2	59.4	39.2
407	blackberries	Brombeeren	Brombeeren	2	4.6	1.2	1	2.7	30	1	8	40	1.84	0.48	0.4	1.08	12	0.393449	0.283649	0.322902	0.381104	64.3511	67.1899	0.173056	0.45409	16.4795	99.5	99.7	62.6	38.3	33.5	66.7	39.9
408	fish with vegetables, grilled	Fisch mit Gemuese, gegrillt	Fisch mit Gemuese, gegrillt	10	1.5	10.19	1.46	6.28	80.49	2	1	350	5.25	35.665	5.11	21.98	281.715	0.429867	0.360482	0.209652	0.345867	31.7859	79.9757	0.112537	0.325377	17.5581	79	94.7	44.6	28.1	59.9	42.8	21.9
409	salmon	Lachs	Lachs	7	0	18.5	12	0	217	3	1	250	0	46.25	30	0	542.5	0.380267	0.342042	0.277691	0.358719	39.9799	45.9951	0.049463	0.137888	17.2198	99.6	100	42.9	25.3	33.1	45.7	22.2
410	peanuts	Erdnuesse	Erdnuesse	2	7.8	25.3	48.1	8.3	561	4	60	300	23.4	75.9	144.3	24.9	1683	0.472735	0.323022	0.204244	0.414059	36.8764	59.4325	0.128685	0.310789	17.4772	100	100	56.4	25.9	28	57.8	31.1
411	mixed vegetables	Gemuesemix (Blumenkohl, Karotten, Blumenkohl, Bohnen, Erbsen)	Gemuesemix gekocht	3	3.4	3.53	0.38	5	39	1	1	380	12.92	13.414	1.444	19	148.2	0.458985	0.407781	0.133234	0.418667	53.8336	57.1719	0.124667	0.297771	16.5206	99.2	99.1	61.3	33.9	44	55.3	36
412	potatoes	Kartoffeln	Kartoffeln	3	2.167	2	0.11	14.8	71	2	2	200	4.334	4	0.22	29.6	142	0.478223	0.368724	0.153052	0.212785	21.0251	35.0719	0.0331667	0.155869	15.4879	99.1	100	55.8	22.7	22.7	56.8	27.1
413	kiwis	Kiwis	Kiwis	2	2.367	0.87	0.55	9.37	53	2	1.5	195	4.616	1.6965	1.0725	18.2715	103.35	0.439454	0.362791	0.197755	0.404715	45.7855	40.012	0.0488519	0.120707	16.5011	100	99.2	62.2	31.2	28.3	67.1	38.1
414	mixed vegetables	Gemuesemix	Gemuesemix gekocht 2	3	3.2	2.18	0.24	7	42.5	1	1	80	2.56	1.744	0.192	5.6	34	0.387374	0.389403	0.223224	0.36313	27.3255	47.7426	0.0667222	0.183742	14.722	96.3	97	58.1	27.8	38.9	55.9	29.4
415	lemon	Zitrone	Zitronen	2	1.767	0.45	0.38	5.17	36	1	1	184	3.251	0.828	0.6992	9.5128	66.24	0.506846	0.430354	0.0628001	0.393567	21.4341	22.5232	0.0234444	0.0595692	14.3532	99.4	99.1	59.6	31.3	20.5	49.2	20.2
416	pistachios	Pistazien	Pistazien	2	10.2	19	50	16	603	4	52	60	6.12	11.4	30	9.6	361.8	0.491515	0.311858	0.196628	0.450574	46.2217	64.1597	0.136074	0.302002	17.6687	98.2	98.5	60.1	37.8	30.7	64.3	45
417	pea pod	Erbsenschoten	Erbsenschoten	3	4.333	0	0	7	42	1	16	80	3.466	0	0	5.6	33.6	0.333224	0.482169	0.184607	0.456059	39.7692	46.9827	0.128259	0.281234	16.0958	97.5	98.6	54.3	26.6	28.1	55.3	30.1
418	cauliflower	Blumenkohl	Blumenkohl	3	2.65	2.46	0.28	2.34	23	1	1	1000	26.5	24.6	2.8	23.4	230	0.36596	0.340842	0.293198	0.381152	16.6664	25.4911	0.127333	0.334075	15.6981	96	100	54.7	31.8	28.9	62	31.1
419	strawberry cream cake	Erdbeercremetorte	Erdbeercremetorte	5	1.067	3.9	12.8	34.1	268	3	1	700	7.469	27.3	89.6	238.7	1876	0.414682	0.322813	0.262504	0.436219	26.7517	36.2074	0.0587778	0.134744	15.9211	98.2	97.5	47.6	33.1	53.4	51.6	30.2
420	raspberry cream cake	Himbeercremetorte	Himbeercremetorte	5	2.375	3.1	10.6	28.2	221	3	1	800	19	24.8	84.8	225.6	1768	0.550266	0.222552	0.227181	0.566226	75.6949	46.1827	0.0528148	0.0932752	17.4907	69.3	74.5	45.2	24.1	44.8	50.2	24.2
421	raspberry cream cake	Himbeercremetorte	Himbeercremetorte	5	2.375	3.1	10.6	28.2	221	3	1	120	2.85	3.72	12.72	33.84	265.2	0.573357	0.206719	0.219924	0.352059	46.3346	55.2006	0.0691667	0.196463	17.059	83.4	75.2	42.9	33.6	42.3	47	29
422	cream roll	Sahnerolle	Sahnerolle	5	0.767	2.4	15.2	25.2	248	3	1	120	0.92	2.88	18.24	30.24	297.6	0.488028	0.325024	0.186947	0.301815	25.9662	43.183	0.0811481	0.268867	16.746	82.2	79.6	45.9	31.1	43.5	46.8	30.3
423	roll	Broetchen	Broetchen	5	2.475	7.4	1.4	50.6	248	3	1	95	2.351	7.03	1.33	48.07	235.6	0.461226	0.341443	0.197331	0.408607	39.354	38.5894	0.0646111	0.158125	17.4898	99.5	100	59.7	27.4	25.3	64.2	36.3
424	peas cooked	Erbsen gekocht	Erbsen gekocht	3	3.967	5.4	0.2	15.6	84	2	140	130	5.157	7.02	0.26	20.28	109.2	0.31149	0.50497	0.18354	0.334881	44.7822	58.3281	0.109833	0.327977	15.8493	92.2	97	54.7	28.3	26.4	56.5	27.4
425	roll	Broetchen	Broetchen	5	3.3	6.4	1	46.3	223	3	1	60	1.98	3.84	0.6	27.78	133.8	0.50137	0.326577	0.172053	0.302767	36.6278	38.4004	0.0496667	0.164043	17.1422	99.5	99.9	59.4	33	26.9	63.4	35.3
426	Bread	Brot	Brote	5	3.967	8.2	1.2	48.8	242	3	1	900	35.703	73.8	10.8	439.2	2178	0.468648	0.31982	0.211532	0.461219	50.5816	47.6729	0.0852037	0.184736	18.0116	98.1	97.8	61	34.3	28.7	66.3	35.6
427	walnuts	Walnuesse	Walnuesse	2	6.425	14.4	62.5	10.6	654	4	3	15	0.964	2.16	9.375	1.59	98.1	0.472875	0.336681	0.190444	0.3004	24.8033	33.594	0.0525926	0.175075	16.6862	98.7	100	57	25.4	27.7	59	32.2
428	artichoke	Artischocke	Artischocke	3	10.8	2	0.12	2.6	22	1	1	250	27	5	0.3	6.5	55	0.365797	0.404117	0.230085	0.367011	49.9473	57.5055	0.105796	0.288265	17.3392	95.4	93.3	51.6	26.7	37.7	45.6	21.4
429	yellow bell pepper, sliced	gelbe Paprikaschote, geschnitten	Paprika gelb	3	3.6	1.2	0.3	5.3	30	1	1	170	6.12	2.04	0.51	9.01	51	0.481383	0.390465	0.128152	0.38327	25.9256	42.3034	0.0724444	0.189017	15.379	98.5	100	58.6	30.7	30.9	60.1	30.6
430	head of iceberg lettuce	Eisbergsalatkopf	Salatkopf	3	1.567	1	0.2	1.57	13	1	1	650	10.185	6.5	1.3	10.205	84.5	0.377443	0.432014	0.190543	0.416719	38.5941	45.4325	0.0663889	0.159314	16.7271	99.8	98.6	54.4	24.9	25.9	54.8	29.4
431	carrots	Bund Karotten	Karotten	3	2.9	1.3	0.2	5.2	26	1	8	550	15.95	7.15	1.1	28.6	143	0.400826	0.41058	0.188594	0.197804	26.4228	59.7742	0.0693889	0.350797	17.3053	99.8	100	64.2	34.7	29.7	61.2	34.5
432	roman lettuce	Romanasalat	Romanasalat	3	1.3	1.6	0.2	1.5	14	1	1	250	3.25	4	0.5	3.75	35	0.351875	0.45454	0.193585	0.343996	47.7506	48.1441	0.0989074	0.287525	16.2163	94.9	98.2	60.8	29.3	25.2	55.4	31.2
433	squash / pumpkin	Kuerbis	Kuerbis	3	1.6	1.4	0.2	4.6	27	1	1	1200	19.2	16.8	2.4	55.2	324	0.543676	0.300206	0.156118	0.271678	33.2467	35.2928	0.0235741	0.0867722	15.6824	97	97.6	58.2	26.8	23.6	50.5	23
434	leek	Lauch /Porree	Lauch	3	2.525	2.24	0.34	3.21	26	1	1	208	5.252	4.6592	0.7072	6.6768	54.08	0.34402	0.366778	0.289202	0.211652	16.9315	48.8014	0.0530741	0.250761	15.3243	86.8	88.7	48.9	23.6	28.3	49.4	24.8
435	Brussels sprouts	Rosenkohl	Rosenkohl	3	4.167	4.45	0.34	3.29	36	1	20	385	16.043	17.1325	1.309	12.6665	138.6	0.365957	0.437093	0.19695	0.330741	43.0951	59.7081	0.0812037	0.245521	16.9366	94.5	98	53.3	23.1	31.2	46.2	25.7
436	carambola / star fruit	Carambola /Sternfrucht	Carambola /Sternfrucht	2	2.8	1	0.3	6.7	31	1	1	85	2.38	0.85	0.255	5.695	26.35	0.48127	0.418488	0.100242	0.407104	27.9415	25.4356	0.0373704	0.0917957	14.8821	75	75.5	51.4	31.3	30.5	49	28.3
437	potatoes	Kartoffeln	Kartoffeln	3	2.1	2	0.11	14.8	71	2	8	800	16.8	16	0.88	118.4	568	0.454938	0.323396	0.221666	0.394915	42.4764	46.8369	0.0528333	0.133784	16.288	99.7	99.7	55.2	20.9	20.7	60.3	24.2
438	onion	Zwiebel	Zwiebel	3	1.8	1.3	0.2	4.9	28	1	1	60	1.08	0.78	0.12	2.94	16.8	0.475477	0.329399	0.195124	0.334333	27.7368	34.8123	0.0342778	0.102526	15.7383	100	100	48.2	21.9	21.7	49.2	18.5
439	toast/ white bread	Toast / Weißbrot	Toast	5	2.833	7.36	3.34	47.69	253	3	1	25	0.708	1.84	0.835	11.9225	63.25	0.379186	0.344287	0.276527	0.420167	12.0635	24.7979	0.0724444	0.172418	16.237	99.9	100	44.6	23.2	16.3	44.5	22.1
440	bread	Brot	Brote	5	2.733	8.2	1.2	48.8	242	3	1	1100	30.063	90.2	13.2	536.8	2662	0.427421	0.335282	0.237297	0.525285	31.8762	42.5484	0.077537	0.147609	17.1553	98.6	99.7	49.3	23.8	20.5	57	30.1
441	doughnut / donut chocolate	Krapfen Donut mit Schokolade	Donuts	5	1.933	6.9	27	36.4	420	4	1	55	1.063	3.795	14.85	20.02	231	0.528105	0.326715	0.14518	0.3878	69.4873	58.0075	0.0375	0.0966993	16.0102	94.7	96.7	49.8	37.5	27.7	59.5	40.3
442	red bell pepper	rote Paprikaschote	Paprika rot	3	3.6	1.3	0.5	6.4	37	1	1	170	6.12	2.21	0.85	10.88	62.9	0.607019	0.291505	0.101476	0.302567	31.8301	30.217	0.044963	0.148605	14.2959	100	100	63.4	35.8	24	62.8	34.1
443	chroisant	Blaetterteigtasche	Blaetterteigtasche	5	1.633	5.5	23	36	373	4	1	40	0.653	2.2	9.2	14.4	149.2	0.511694	0.312372	0.175934	0.479019	44.8389	37.1176	0.0904259	0.188773	16.6569	87.7	93.5	49	28.1	31.9	56.8	35
444	green bell pepper	gruene Paprikaschote	Paprika gruen	3	2.8	1	0.3	2.9	20	1	1	170	4.76	1.7	0.51	4.93	34	0.368282	0.422109	0.209609	0.368952	50.7954	40.5805	0.0740926	0.200819	15.1404	99.5	99.2	52.3	24	25.1	49.3	21.2
445	yellow bell pepper	gelbe Paprikaschote	Paprika gelb	3	3.6	1.2	0.3	5.3	30	1	1	170	6.12	2.04	0.51	9.01	51	0.534041	0.424299	0.0416596	0.367907	24.9475	28.6292	0.047963	0.130367	14.3131	100	100	56.8	25.4	22.1	55	23.1
446	tomato, sliced	Tomate, geschnitten	Tomate	3	1.233	1	0	3	17	1	1	80	0.986	0.8	0	2.4	13.6	0.648352	0.247745	0.103902	0.257741	33.949	50.6616	0.060963	0.236528	15.6879	98.2	98.4	59.5	36.8	31.8	64.2	37.3
447	mixed vegetables	Gemuesemix	Gemuesemix gekocht	3	3.367	3.3	0.42	9.28	56.62	2	1	130	4.377	4.29	0.546	12.064	73.606	0.40284	0.444062	0.153098	0.473585	48.4654	56.0255	0.128426	0.271178	15.6519	98.2	100	61.2	33.2	39.9	61.9	33.7
448	garden radish	Bund Radieschen	Radieschen	3	1.567	1.05	0.14	2.13	15	1	6	180	2.821	1.89	0.252	3.834	27	0.453993	0.331427	0.21458	0.326207	42.143	62.2544	0.104759	0.321143	16.4792	97.1	97.6	52.3	28.6	30.5	47.2	21.4
449	garden radish	Radieschen	Radieschen	3	1.567	1.05	0.14	2.13	15	1	1	30	0.47	0.315	0.042	0.639	4.5	0.408483	0.376941	0.214576	0.266893	30.2611	45.5098	0.0852778	0.319521	16.04	98.9	96.9	51.4	26.7	23	50.1	29
450	hazelnuts	Haselnuesse	Haselnuesse	2	9.2	11.96	61.6	10.54	636	4	26	182	16.744	21.7672	112.112	19.1828	1157.52	0.531724	0.30414	0.164136	0.418674	46.5368	55.7616	0.120537	0.287902	17.3621	98.4	98	49.8	23.9	26.9	51	24.4
451	hazelnut	Haselnuss	Haselnuesse	2	9.2	11.96	61.6	10.54	636	4	1	7	0.644	0.8372	4.312	0.7378	44.52	0.592499	0.308871	0.0986302	0.389222	48.8243	41.3296	0.0843333	0.216671	16.6045	63.3	83.8	45.8	27.9	28.9	48	20.3
452	water melon	Wassermelone	Wassermelone	2	0.25	0.6	0.2	8.28	38	1	0.5	1800	4.5	10.8	3.6	149.04	684	0.495319	0.303936	0.200746	0.345804	40.2634	41.3166	0.0454259	0.131363	16.4323	99.4	100	67.6	42.3	29.3	69.1	46.3
453	peach	Pfirsich	Pfirsiche	2	1.95	0.7	0.1	9.4	41	1	1	125	2.438	0.875	0.125	11.75	51.25	0.567952	0.303217	0.128831	0.376533	42.3638	53.0711	0.0551481	0.146463	16.2367	99.8	97.6	64.9	39.1	26.9	68.6	42.8
454	pineapple	Ananas	Ananas	2	1.4	0.4	0.2	12.4	53	2	0.5	450	6.3	1.8	0.9	55.8	238.5	0.381552	0.400773	0.217675	0.318152	36.6643	62.3383	0.0956667	0.300695	18.007	100	100	65.2	41	36.1	75.4	49.4
455	spinach	Spinat	Spinat	3	2.6	2.52	0.3	0.55	17	1	1	80	2.08	2.016	0.24	0.44	13.6	0.331418	0.487625	0.180957	0.400574	51.5615	63.4814	0.138611	0.346031	17.2497	83.2	96	60.9	31.2	31.8	57.8	31.6
456	glass of beer	Glas Bier	Glas Bier	8	0.1	0.5	0	3.12	42	1	1	500	0.5	2.5	0	15.6	210	0.418083	0.355256	0.226661	0.291033	17.1001	34.5268	0.0558519	0.191909	16.2529	99.4	99.3	43	25	30	42.8	22.9
457	pine nuts	Pinienkerne	Pinienkerne	2	3.967	17.7	50.4	10.2	559	4	250	60	2.38	10.62	30.24	6.12	335.4	0.505908	0.323374	0.170718	0.411885	37.9331	62.1479	0.185463	0.450278	17.2975	68.3	72.4	48.5	25.1	31.4	41.8	22.6
458	lemon 1, half	Zitrone , halbe	Zitronen	2	1.767	0.45	0.38	5.17	36	1	0.5	92	1.626	0.414	0.3496	4.7564	33.12	0.49901	0.404644	0.0963456	0.350285	26.929	30.5498	0.0375185	0.107108	15.7893	98.1	99.4	61.9	34.6	34.7	52.9	19.2
459	corn / maize	Mais	Mais	5	3.733	5.1	2.3	42	211.2	3	1	250	9.332	12.75	5.75	105	528	0.449095	0.362846	0.188058	0.209741	11.5468	27.7587	0.0982407	0.468391	15.5651	98.8	99.6	57.9	32.3	30.2	61.4	32.9
460	tomato	Tomate	Tomate	3	1.233	1	0	3	17	1	1	80	0.986	0.8	0	2.4	13.6	0.754338	0.205387	0.0402746	0.467381	70.7538	27.6464	0.0293148	0.0627214	15.4627	96.6	100	60.3	30.9	17.7	62.9	31.1
461	vegetables	Gemuese	Gemuesemix roh 2	3	2.16	1.77	0.24	2.39	20	1	9	1943	41.969	34.3911	4.6632	46.4377	388.6	0.456314	0.344285	0.199401	0.298326	44.3158	62.5641	0.0688519	0.230794	17.0529	99.6	100	64.2	36.8	45.9	69	38.9
462	plate with raw hamburger patties and sausages	Teller rohe Buletten und Wuerstchen	Teller rohe Buletten und Wuerstchen	6	0.165	18	17.5	0.3	228.6	3	30	3700	6.105	666	647.5	11.1	8458.2	0.422533	0.306094	0.271373	0.445959	25.9635	54.1037	0.111722	0.250521	16.6719	95.2	98.8	33	24	36.8	31.9	17.5
463	fruits	Fruechte	Fruechte	2	2.307	1.18	0.44	12.98	58.29	2	13	1020	23.531	12.036	4.488	132.396	594.558	0.516376	0.356916	0.126708	0.437941	50.1051	55.6983	0.0658889	0.150452	16.5874	91.7	95	63	36.4	53.8	67.2	45.2
464	fruits	Fruechte	Fruechte	2	2.6	0.42	0.13	11.76	51.69	2	12	1990	51.74	8.358	2.587	234.024	1028.63	0.5381	0.330405	0.131495	0.4228	54.3598	55.9821	0.0707778	0.167403	16.8037	99.6	99.7	69.7	42.6	46.8	72.7	48.2
465	pralines	Pralinen	Pralinen	4	3.023	6.5	38	50	566	4	6	70	2.116	4.55	26.6	35	396.2	0.474303	0.298107	0.22759	0.3539	58.9906	60.9829	0.0900556	0.254466	16.762	99.9	99.1	59.3	46.7	45.9	69.1	49.3
466	green apple	gruener Apfel	gruener Apfel	2	2.067	0.34	0	11.43	52	2	1	220	4.547	0.748	0	25.146	114.4	0.396473	0.469463	0.134064	0.430537	30.1566	25.3238	0.0452778	0.105166	15.5009	100	96.1	58.4	31.4	23	60.7	38.4
467	rasberry	Himbeere	Himbeeren	2	5.7	1.3	0.3	4.8	34	1	1	5	0.285	0.065	0.015	0.24	1.7	0.684352	0.144785	0.170863	0.351322	55.7948	38.8582	0.0469815	0.133728	15.9921	97.6	97.9	73.3	48.8	29	76	52.9
468	blackberry	Brombeere	Brombeeren	2	4.6	1.2	1	2.7	30	1	1	5	0.23	0.06	0.05	0.135	1.5	0.456859	0.290004	0.253137	0.371522	72.5945	36.0773	0.0460556	0.123964	15.452	72.2	90	58.8	36.4	34.9	63.2	41.5
469	toast	Toast	Toast	5	2.75	7.36	3.34	47.69	253	3	2	50	1.375	3.68	1.67	23.845	126.5	0.421238	0.346391	0.232371	0.339611	21.1115	45.1322	0.117	0.344512	15.082	97.9	99.3	46.5	23	22.2	44.3	24.4
470	pancakes with blueberries	Pfannkuchen mit Heidelbeeren	Pfannkuchen mit Fruechten	10	1.4	8	10.65	16	190	2	4	240	3.36	19.2	25.56	38.4	456	0.394622	0.313023	0.292355	0.450689	39.0435	86.9163	0.0962222	0.2135	17.1836	89.7	95.8	58	40	40	66.1	40.1
471	French Toast	Arme Ritter	Arme Ritter	5	1.3	5.94	8.16	34.01	235	3	4	408	5.304	24.2352	33.2928	138.761	958.8	0.401112	0.325903	0.272985	0.497641	27.017	60.3158	0.130426	0.262089	17.8041	83.7	90.4	48.7	34.8	32	49.8	34.2
472	Cappuccino	Cappuccino	Cappuccino	8	0	2	2	0.6	43	1	1	160	0	3.2	3.2	0.96	68.8	0.367324	0.332447	0.300229	0.44113	26.8224	45.2311	0.116593	0.264305	16.4205	87.2	90.7	53.6	36.9	38.5	60.3	44.1
473	cheeseburger	Cheeseburger	Cheeseburger	10	0.8	15.96	12.54	14.38	235.26	3	1	245	1.96	39.102	30.723	35.231	576.387	0.49027	0.352277	0.157453	0.542381	53.1956	49.2433	0.109889	0.202604	16.5507	99.8	98.8	42.2	29.5	36	45.9	28.2
474	croissant with butter and jam	Croissant mit Butter und Marmelade 2	Croissant mit Butter und Marmelade 2	10	2.125	5.43	32.67	42.67	478.43	4	3	105	2.231	5.7015	34.3035	44.8035	502.351	0.439675	0.337423	0.222902	0.436022	32.2642	48.5386	0.0686852	0.157527	16.0209	99.9	99	55.3	31.5	31.3	61.8	31.5
475	apple Danish	Apfeltasche	Apfeltasche	5	2.067	3	14	30	287	3	1	95	1.964	2.85	13.3	28.5	272.65	0.438694	0.34424	0.217066	0.483015	26.1384	36.1941	0.111926	0.231724	15.4291	72.7	77.9	47.3	31.8	31.8	52.8	30.6
476	espresso	Espresso	Espresso	8	0.033	0	0	0	4	1	1	60	0.02	0	0	0	2.4	0.288225	0.355852	0.355923	0.408707	76.0179	63.0399	0.0957963	0.234388	16.3422	97.8	100	54.9	40.6	28.1	55.1	41.8
477	glass of gherkins	Gewuerzgurkenglas	Gewuerzgurke	3	0.9	0.64	0.18	1.82	16	1	12	350	3.15	2.24	0.63	6.37	56	0.368539	0.395944	0.235517	0.249048	31.814	52.2263	0.0904074	0.363012	15.157	99.7	100	51.4	30.3	35.3	55.6	28.8
478	pineapple	Ananas	Ananas	2	1.4	0.4	0.2	12.4	53	2	1	900	12.6	3.6	1.8	111.6	477	0.373243	0.370034	0.256723	0.140707	14.1818	58.3222	0.0651296	0.462873	16.4608	100	100	61.4	37.1	33.5	68.2	42.2
479	papaya	Papaya	Papaya	2	1.8	0.37	0.07	1.73	9	1	0.5	175	3.15	0.6475	0.1225	3.0275	15.75	0.504769	0.317945	0.177286	0.404293	42.0662	53.9618	0.0818333	0.202411	16.9697	87.1	82.3	54.6	32	38.2	53.5	33.9
480	rolls in a basket	Broetchenkorb	Broetchen	5	3.2	7.4	1.4	50.6	248	3	6	570	18.24	42.18	7.98	288.42	1413.6	0.438708	0.311953	0.249339	0.51243	37.4428	54.399	0.0963333	0.187993	16.9966	95.7	95.1	52.3	24.7	32	54	29.9
481	flat cake with salad	Fladen mit Salat	Fladen mit Salat	10	1.733	5.9	7.37	29.61	208.85	3	7	70	1.213	4.13	5.159	20.727	146.195	0.401459	0.370081	0.22846	0.340022	31.3664	63.6873	0.0896667	0.263708	15.6992	79.3	89.9	55	28.4	45.9	57.7	31.8
482	mixed salad	Teller mit gemischtem Salat	Salatteller mit gruener Paprika und Tomate	10	1.3	1.02	0.18	2.78	17.52	1	1	270	3.51	2.754	0.486	7.506	47.304	0.439445	0.348683	0.211871	0.436104	37.0837	60.5824	0.1385	0.317585	16.0596	98.4	99.2	63.7	36.3	46.8	67.8	40.5
483	pancake with fruits	Pfannkuchen mit Fruechten	Pfannkuchen mit Fruechten	10	1.45	5.7	7.3	14.2	148	2	4	340	4.93	19.38	24.82	48.28	503.2	0.453016	0.301076	0.245908	0.511341	43.7478	80.0155	0.116889	0.228593	17.0742	90	95.6	58.7	34.9	53.6	65.8	38.3
484	steak with backed potato and vegetables	Steak mit Backkartoffel und Gemuese	Steak mit Backkartoffel und Gemuese	10	1.957	10.2	1.43	7.71	85.11	2	10	440	8.611	44.88	6.292	33.924	374.484	0.438814	0.32783	0.233356	0.542604	57.8352	65.389	0.154167	0.284124	17.0182	94.4	97	51.3	34.1	54.7	53.2	34
485	burger patty with french fries and salad	Bulette mit Pommes frites und Salat	Frikadelle mit Pommes frites und Salat	10	1.06	8.45	10.2	20.87	199.64	3	4	550	5.83	46.475	56.1	114.785	1098.02	0.46438	0.31126	0.22436	0.435274	49.5171	62.8118	0.154352	0.354608	16.4258	99.5	99.5	41.6	24.7	48.6	49.7	29.6
486	spare ribs with french fries and salad	Spare Ribs mit Pommes frites und Sala	Spare ribs mit Pommes frites und Salat	10	1.107	9.31	11.97	19.16	212.97	3	3	540	5.978	50.274	64.638	103.464	1150.04	0.479299	0.335015	0.185686	0.379	39.2404	70.0052	0.107889	0.284667	16.4904	84.9	98.1	46.9	34.2	50.8	56.6	38.2
487	bagel with cream cheese and vegetables	Bagel mit Frischkaese und Gemuese	Bagel mit Frischkaese und Gemuese	10	2.7	8	7.4	41.5	281	3	5	110	2.97	8.8	8.14	45.65	309.1	0.38647	0.371319	0.242211	0.481344	37.7553	60.5006	0.107778	0.22391	16.6105	88.8	94.7	45.4	25.3	38.1	47.5	28.1
488	waffle with whipped cream	Waffel mit Sahne	Waffel rund	5	1.6	3.6	21.4	52.5	331	3	1	80	1.28	2.88	17.12	42	264.8	0.40747	0.319544	0.272986	0.445848	23.4139	58.5644	0.0995556	0.223295	16.0131	99	99.6	54.8	34.6	30.7	65.8	35
489	pizza with salami	Pizza mit Salami	Pizza Salami	10	1.967	10	12	16	245	3	1	350	6.885	35	42	56	857.5	0.487573	0.295728	0.216699	0.471156	44.3578	64.4758	0.155167	0.329332	16.7391	98.5	100	51	36.3	40.2	55.6	36.1
490	potatoes and corn	Kartoffeln und Mais	Kartoffeln und Mais	10	2.363	2.5	1.05	13	74	2	56	40	0.945	1	0.42	5.2	29.6	0.452888	0.395156	0.151956	0.355648	26.8328	33.5473	0.0937778	0.263681	14.8632	72.3	86.8	49.1	24.8	33.5	47.5	23
491	sundae	Eisbecher	Eisbecher	4	0.847	2.93	8	30.46	200.57	3	1	350	2.964	10.255	28	106.61	701.995	0.510228	0.312332	0.17744	0.165341	16.4008	61.9072	0.0480741	0.290758	16.2839	99.9	100	51.9	36.1	44.7	63.1	40.8
492	vanilla and chocolate icecream cone	Vanille- Schokoladen Eiswaffeln	Softeis	4	0.433	2.7	8.6	23.5	182	2	3	489	2.117	13.203	42.054	114.915	889.98	0.496779	0.33903	0.16419	0.351196	39.683	45.0221	0.0936296	0.266602	15.8229	100	100	56.6	38.6	31.6	63.6	38.3
493	spare ribs with french fries and salad	Spare ribs mit Pommes frites und Salat	Spare ribs mit Pommes frites und Salat 2	10	0.75	8.63	11.26	18.56	202.14	3	4	590	4.425	50.917	66.434	109.504	1192.63	0.491786	0.292704	0.21551	0.42867	56.4653	61.5154	0.110148	0.256953	17.2892	95.2	95.5	47.7	38	50.3	53.4	37.9
494	pretzel	Salzbrezeln	Salzbrezeln	9	3.433	10	16	64	440	4	4	10	0.343	1	1.6	6.4	44	0.544116	0.327792	0.128092	0.203281	22.789	60.7449	0.0807037	0.397005	16.3849	96.9	99.7	49.6	27.7	24.4	47.5	25.9
495	breads	Brote	Brote	5	2.81	7.23	1.1	45.8	224.5	3	3	1120	31.472	80.976	12.32	512.96	2514.4	0.522102	0.317114	0.160784	0.355063	42.4852	45.1436	0.0816852	0.230058	16.7819	89.6	97.4	55.5	35.5	44.6	57.7	36.9
496	sausage	Wurst	Leberwurst grob	6	0.05	14	25	2	289	3	1	250	0.125	35	62.5	5	722.5	0.511595	0.279168	0.209237	0.228022	25.9126	32.416	0.0276296	0.121171	15.6517	96.3	97.4	37.2	24.6	31.3	39.4	21.7
497	meat pie	Fleischpastete	Fleischpastete	6	0.538	20.8	21.8	0.9	281	3	1	60	0.323	12.48	13.08	0.54	168.6	0.449323	0.320813	0.229864	0.397056	37.6321	34.0094	0.0358519	0.0902943	16.1822	59.6	59.8	18.5	14.6	36.7	14.6	7.2
498	meat pie	Fleischpastete	Fleischpastete	6	0.167	17.9	25.1	1.1	299	3	1	60	0.1	10.74	15.06	0.66	179.4	0.481167	0.31282	0.206013	0.394052	37.9045	37.5689	0.0432407	0.109734	15.9235	79.1	80.5	28.1	16.8	23.7	23.4	8.2
499	pieces of chocolate	Schokoladenstuecke	Schokolade nuss dunkel	4	5.167	7	38	47	559	4	3	18	0.93	1.26	6.84	8.46	100.62	0.448175	0.329874	0.221951	0.226807	35.4585	66.0664	0.0577778	0.254744	16.5892	93	99.8	45.8	30.6	31.8	52.9	28.3
500	chocolate bar	Schokoladenriegel	Schokoriegel ganz	4	2.7	6.9	34.5	51.2	561	4	1	15	0.405	1.035	5.175	7.68	84.15	0.573344	0.292793	0.133862	0.239207	40.9477	43.2483	0.0396667	0.165825	15.8304	83.1	80	44.3	23	30.7	49.4	29.1
501	chocolate bar , bite	Schokoladenriegel, angebissen	Schokoriegel	4	1.9	4.7	28	54	487	4	1	32	0.608	1.504	8.96	17.28	155.84	0.538695	0.314071	0.147234	0.32463	47.4262	40.6285	0.057	0.175585	16.6071	81.7	84.1	44	29	36	54.2	30.8
502	mixed vegetables, cooked	Gemuesemix	Blumenkohlgemuese	3	3.133	7.3	0.2	8	44.3	1	17	35	1.097	2.555	0.07	2.8	15.505	0.429253	0.372251	0.198496	0.453037	38.5345	53.1439	0.084463	0.186437	15.357	100	100	56.3	29.5	41.8	56.1	33.2
503	shortbreads	Butterkekse	Butterkekse	4	5.225	5.7	30.7	57.3	528	4	6	60	3.135	3.42	18.42	34.38	316.8	0.488768	0.368303	0.142929	0.391185	32.4062	33.5477	0.125778	0.32153	15.6967	91.1	84.3	45.8	25.3	25.7	51.8	26.3
504	shortbread	Butterkeks	Butterkekse	4	5.225	5.7	30.7	57.3	528	4	1	10	0.522	0.57	3.07	5.73	52.8	0.512613	0.365345	0.122042	0.382874	37.0248	31.1827	0.0756296	0.197531	15.8471	96.5	90.4	43.5	26.1	21.8	50.4	27.2
505	cookies	Orangenkekse mit Schokolade	Orangenkekse mit Schokolade	4	2	3	10	69	384	4	3	39	0.78	1.17	3.9	26.91	149.76	0.507767	0.338061	0.154173	0.361559	42.9586	54.6996	0.0608333	0.168253	16.9741	88.3	88	43.5	26.1	28.9	46.9	24.6
506	cookie	Orangenkeks mit Schokolade	Orangenkekse mit Schokolade	4	2	3	10	69	384	4	1	13	0.26	0.39	1.3	8.97	49.92	0.444907	0.324281	0.230812	0.461307	83.5665	32.7586	0.066963	0.145159	16.132	79.1	81.1	41.3	25.1	26.3	45.6	24.5
507	waffle	Waffel	Waffel rund	5	1.1	4.7	23.2	42.9	400	4	1	115	1.265	5.405	26.68	49.335	460	0.542014	0.366255	0.0917306	0.455967	47.6724	30.7714	0.0792593	0.173827	15.6674	97.6	99.1	51.5	34.6	25.3	59.6	37.1
508	head of green lettuce	gruener Salatkopf	Salatkopf	3	1.5	1.25	0.22	1.06	12	1	1	500	7.5	6.25	1.1	5.3	60	0.271386	0.491105	0.237508	0.406659	59.7535	51.5489	0.122241	0.300597	16.5693	93.3	94.3	60.8	28	24.7	58.6	30.1
509	mixed vegetables	Gemuesemix	Blumenkohlgemuese	3	2.533	2.7	0.3	6	39	1	12	20	0.507	0.54	0.06	1.2	7.8	0.391306	0.395996	0.212698	0.309648	25.851	49.078	0.0668333	0.215836	14.8184	97.5	97.8	54	26.7	39.9	49.5	24.6
510	chocolate bar, broken	Schokoladenriegel, angebrochen	Schokoriegel	4	1	3.8	16.6	70.1	448	4	1	51	0.51	1.938	8.466	35.751	228.48	0.460789	0.328114	0.211097	0.279626	45.5617	54.1456	0.0420556	0.150399	15.6458	97.7	98.8	43.1	33.9	33.4	56.4	36.6
511	marzipan chocolate	Marzipanpraline	Praline aufgeschnitten	4	0.833	4.5	34	53.5	535	4	1	17	0.142	0.765	5.78	9.095	90.95	0.418101	0.336366	0.245532	0.300081	35.5026	80.2411	0.071	0.236602	16.6385	67.2	53.8	44.1	30	38.7	44.2	29.5
512	crispbread with cooked ham	Knaeckebrot mit Kochschinken	Knaeckebrot mit Kochschinken	10	17.467	16.13	2.58	24.52	191	2	1	31	5.415	5.0003	0.7998	7.6012	59.21	0.435397	0.342572	0.222031	0.315515	31.974	47.9941	0.0701852	0.222447	16.6782	85	84.7	37.8	18.4	34.2	33	18.6
513	olives	Oliven	Oliven	3	3.767	1.8	24.25	3.95	237.5	3	2	20	0.753	0.36	4.85	0.79	47.5	0.357446	0.388725	0.253829	0.319178	57.7692	46.6539	0.0415185	0.13008	15.4941	98.2	99.9	54.5	27.3	23.4	50.2	29.3
514	camembert	Camembert	Weichkaese	1	0	21	22.3	0.1	284	3	1	180	0	37.8	40.14	0.18	511.2	0.347629	0.342133	0.310238	0.458889	22.6167	30.3977	0.0507407	0.110573	14.7609	97.6	97.6	51.6	33.8	27.1	56.7	28.8
515	emmentaler cheese	Emmentaler	Emmentaler	1	0	28.7	30	0	383	4	1	200	0	57.4	60	0	766	0.407262	0.376534	0.216204	0.333467	15.4815	18.578	0.037	0.110956	13.6314	99.4	97.7	52	28.2	26.2	56.9	27.7
516	Edam cheese	Edamer	Edamer	1	0.05	23	30	0	346	3	1	180	0.09	41.4	54	0	622.8	0.483195	0.323904	0.1929	0.329452	26.5289	33.3445	0.0285556	0.086676	14.8116	85.7	97.6	51.8	27.8	26	58.5	33.2
517	cheese	Kaese	Hartkaese Stueck	1	0	27	32	0	392	4	1	150	0	40.5	48	0	588	0.43412	0.366799	0.199081	0.303344	18.015	31.7292	0.0386111	0.127285	14.264	95.3	96.2	57.1	35.1	21.8	62.1	37.3
518	glass of beer	Glas Bier	Glas Bier	8	0.1	0.5	0	4	46	1	1	250	0.25	1.25	0	10	115	0.482037	0.310404	0.207558	0.151537	17.6548	49.5673	0.0395556	0.261029	15.9849	91.5	93.4	47.4	28	28.2	45.1	27.8
519	camembert	Camembert	Weichkaese	1	0	21	22.3	0.1	284	3	1	50	0	10.5	11.15	0.05	142	0.361137	0.355823	0.28304	0.345874	20.191	40.2128	0.0306852	0.0887178	14.8064	96.5	99	56.7	38.8	24.7	60.6	35.6
520	green chili	gruene Peperoni	gruene Peperoni	3	1.833	1	0.3	7.9	47	1	3	25	0.458	0.25	0.075	1.975	11.75	0.418762	0.419593	0.161644	0.303244	17.4371	28.8015	0.0592593	0.195417	14.8666	99.6	98.7	48.3	27.6	23.4	43.2	19.1
521	rigatoni with vegetable	Rigatoni mit Gemuese	Rigatoni mit Gemuese	10	2.583	7.05	1.3	33.2	173	2	80	600	15.498	42.3	7.8	199.2	1038	0.395129	0.408496	0.196375	0.476881	48.2073	61.9981	0.110685	0.232102	16.5033	96.9	97	55.4	36.1	45.4	56.6	31.2
522	vegetables	Gemuese	Gemuesemix roh 3	3	2.023	1.4	0.15	2.25	16.6	1	3	320	6.474	4.48	0.48	7.2	53.12	0.413086	0.407766	0.179148	0.369344	47.7496	48.8119	0.0806296	0.218305	16.4063	100	99.4	56.5	30.3	33.9	57	30.1
523	chocolate biscuit	Schokoladenbisquit	Schokoladenbisquit gefuellt	4	1.8	5	15	40	294	3	1	160	2.88	8	24	64	470.4	0.477988	0.311025	0.210986	0.277185	35.0923	60.8305	0.0643333	0.232095	17.028	70.9	73.3	39.5	30.7	40.7	48.5	26.7
524	vanilla icecream cone	Vanilleeiscremewaffel	Softeis	4	0.407	2.7	8.6	23.5	182	2	1	163	0.663	4.401	14.018	38.305	296.66	0.403308	0.346708	0.249984	0.141041	10.102	38.125	0.0401481	0.284656	13.9752	98.3	99.4	55.6	36.1	26.9	57.2	39.6
525	walnut	Walnuss	Walnuesse	2	6.425	14.4	62.5	10.6	654	4	1.5	7.5	0.482	1.08	4.6875	0.795	49.05	0.544569	0.329106	0.126326	0.446778	50.3417	47.1945	0.0813148	0.182003	16.5141	99.8	100	60.7	32.7	36.6	61.3	37.5
526	plate of salad	Salatteller	Salatteller exotisch	10	1.867	1.58	2.29	4.93	47.3	1	1	230	4.294	3.634	5.267	11.339	108.79	0.41837	0.381254	0.200376	0.484978	50.2637	65.0578	0.161685	0.333387	16.5433	94.7	99.7	65.2	41.7	56.6	69.2	49.8
527	tuna sandwiches	Thunfischsandwichs	Thunfischsandwich	10	1.333	10	11	22	231	3	2	180	2.399	18	19.8	39.6	415.8	0.381981	0.332934	0.285085	0.445419	21.8842	57.3697	0.0823519	0.184886	15.9611	88.9	97.5	50.5	35.2	43.7	54.2	39.3
528	peaches	Pfirsiche	Pfirsiche	2	1.967	0.7	0.1	9.4	41	1	2.5	312.5	6.147	2.1875	0.3125	29.375	128.125	0.513627	0.289342	0.197031	0.473215	50.395	56.3428	0.0672593	0.142133	16.2083	98.7	98.7	69.8	44	31.7	73.8	46.2
529	mixed vegetables	Gemuesemix	Gemuesemix gekocht	3	3.567	4	0.4	5.5	43	1	1	300	10.701	12	1.2	16.5	129	0.45949	0.420531	0.119979	0.438556	57.0995	52.7462	0.121148	0.276244	15.9596	100	100	61.4	25.5	47.6	57	29.6
530	strawberry, half	Erdbeere, halbiert	Erdbeeren	2	2.133	0.8	0.4	5.5	32	1	1	40	0.853	0.32	0.16	2.2	12.8	0.566852	0.2787	0.154448	0.348207	49.6294	50.8296	0.0715185	0.205391	17.2314	100	100	65	49.1	32.3	72.4	58.5
531	rasberries	Himbeeren	Himbeeren	2	5.7	1.3	0.3	4.8	34	1	19	95	5.415	1.235	0.285	4.56	32.3	0.698449	0.123079	0.178472	0.372793	57.0626	52.9193	0.0805556	0.216087	17.4139	100	99.5	68.8	43	26.8	76.9	57.7
532	water bottle	Wasserflasche	Wasserflasche	8	0	0	0	0	0	1	1	10000	0	0	0	0	0	0.29142	0.334766	0.373814	0.207074	12.3742	41.6004	0.0452593	0.218566	15.0825	92.7	94.8	67	32.4	19.2	60.4	55.3
533	cookie	Keks Schweineohr	Schweineohr	4	1.533	5	32	37	459	4	1	20	0.307	1	6.4	7.4	91.8	0.458933	0.370312	0.170755	0.493352	30.9356	25.6709	0.0447037	0.0906122	16.0938	88.5	86.5	48.3	28.6	36.7	50.6	28.4
534	pieces of fruit	Fruchtstuecke	Fruechte	2	1.777	0.8	0.42	12.6	59.7	2	19	130	2.31	1.04	0.546	16.38	77.61	0.44229	0.400327	0.157383	0.293022	21.4314	42.1816	0.0656852	0.224165	15.7765	100	99.6	68	38.8	37.7	73.3	48
535	sausages	Wuerstchen	Wuerstchen	6	0.05	13.5	16	0.5	200	3	2	100	0.05	13.5	16	0.5	200	0.524821	0.296447	0.178732	0.290867	31.2862	30.7495	0.0488519	0.167953	14.8677	98.4	98.1	35.8	29.3	21.1	42.8	21.7
536	cooked ham cut	Kochschinken Aufschnitt	Schinken	6	0.25	20	3	1	111	2	9	170	0.425	34	5.1	1.7	188.7	0.468993	0.303849	0.227159	0.298993	22.5175	26.3892	0.0561852	0.187915	14.7851	91.3	93.7	34.4	19.4	23.8	36	16.1
537	beefsteak, raw	Rindersteak, roh	Steak, roh	6	0	20	3	1	111	2	1	200	0	40	6	2	222	0.503197	0.309058	0.187744	0.419089	50.9044	38.478	0.0805185	0.192128	16.7232	93.6	93.8	38.8	26.5	29.4	45.4	21.3
538	liver sausage	Leberwurst,grob	Leberwurst grob	6	0.05	14	25	2	289	3	1	250	0.125	35	62.5	5	722.5	0.601219	0.273506	0.125275	0.344981	46.4076	35.157	0.0326852	0.0947448	15.8783	95	96	31	15.7	25.4	33.4	13.7
539	almonds	Mandeln	Mandeln	2	13.167	21.7	50	9.4	598	4	26	80	10.534	17.36	40	7.52	478.4	0.539293	0.33371	0.126997	0.321041	36.8713	50.7712	0.0930185	0.289741	16.964	96.7	98.9	58.5	30.2	24	58	37.2
540	beefsteak, raw	Rindersteak, roh	Steak, roh	6	0	20	3	1	111	2	2	300	0	60	9	3	333	0.55984	0.219136	0.221023	0.516652	69.5091	50.4035	0.0940185	0.181977	18.0609	89.4	94.4	36.7	24	27.8	38.7	18.3
541	chicken, raw	Huehnchen, roh	Haehnchen, roh	6	0	21	2	0	109	2	4	520	0	109.2	10.4	0	566.8	0.401824	0.330065	0.268111	0.352707	29.3321	56.08	0.116926	0.33151	16.1865	69.1	85.1	42.5	25.9	42.4	36.6	20.3
542	avocado	Avocado	Avocado	2	3.333	1.9	23.5	0.4	217	3	1	250	8.332	4.75	58.75	1	542.5	0.370141	0.348127	0.281732	0.340226	36.8925	65.3723	0.0714259	0.209937	16.4943	96	93	55.7	30.1	31.5	53.5	33.1
543	grapes, white	Weintrauben, weiß	Trauben	2	1.5	0.7	0.3	15.6	71	2	120	500	7.5	3.5	1.5	78	355	0.398079	0.444624	0.157297	0.326985	27.7868	23.6157	0.0939259	0.287248	14.9663	100	100	67	43.2	23.7	75	55.3
544	beefsteak, raw	Steak, roh	Raeucherschinken	6	0	19.6	6	0.1	174	2	1	150	0	29.4	9	0.15	261	0.599259	0.224982	0.175759	0.289178	33.3755	40.3329	0.0437963	0.151451	15.2275	96.5	97	39.2	27.9	28.2	37.1	27.5
545	shrimp	Shrimp	Shrimp	7	0	18.9	1.51	0.78	93	2	1	5	0	0.945	0.0755	0.039	4.65	0.485432	0.316116	0.198451	0.341852	22.4706	29.7452	0.0585	0.171127	14.8686	96.8	98.7	50.5	35.4	28.4	53.6	33.4
546	chicken, roasted	Haehnchen, gegrillt	Gegrilltes Huhn	6	0	27.9	13.4	0	233	3	1	500	0	139.5	67	0	1165	0.558636	0.298182	0.143182	0.4695	50.8948	43.6853	0.111944	0.238433	17.2984	95.3	100	40.3	29.2	32	50.5	27.5
547	hot dog	Hot Dog	Hot Dog plain	10	2.2	21.5	20	51.5	472	4	1	112.5	2.475	24.1875	22.5	57.9375	531	0.543033	0.30362	0.153347	0.390207	37.0854	41.4142	0.0528889	0.13554	15.0635	98.2	99.6	36.8	30.7	26	43.3	25.6
548	cooked ham	Kochschinken	Schinken	6	0	19	3	1	107	2	1	400	0	76	12	4	428	0.535209	0.287764	0.177027	0.44263	42.2567	20.9148	0.0262407	0.0592837	15.5906	97.3	97.1	34.8	21.2	22.5	39.5	20.7
549	bagel	Bagel	Bagel	5	2.375	7.7	1.7	50.6	233	3	1	80	1.9	6.16	1.36	40.48	186.4	0.525937	0.33257	0.141492	0.458926	38.6885	19.53	0.0368519	0.0803002	15.026	91.7	92.9	46.7	27.9	21.5	45.7	27.5
550	Brussels sprouts	Rosenkohl	Rosenkohl	3	4.167	4.45	0.34	3.29	36	1	19	500	20.835	22.25	1.7	16.45	180	0.370507	0.432937	0.196555	0.483922	56.87	60.2913	0.130019	0.268676	15.8396	96.5	94.6	44.1	22.7	26.2	40.3	16.9
551	spaghetti with pesto	Spaghetti mit Pesto	Spaghetti mit Pesto	10	2.89	6.5	6.9	29.5	207	3	1	200	5.78	13	13.8	59	414	0.461557	0.383222	0.15522	0.366367	32.3882	45.9304	0.12587	0.343564	15.913	85.5	94.5	55.3	36.8	50.6	65.1	41.1
552	roast beef	Rinderbraten	Braten	6	0	12	7.4	1.5	120	2	1	500	0	60	37	7.5	600	0.516592	0.304229	0.179179	0.373167	57.0715	47.483	0.056	0.150067	16.9163	94.6	96.7	43.6	32.4	27.9	46.6	29.4
553	filled roulade	Roulade mit Fuellung	Rouladen roh	6	0.3	15	9	2	149	2	1.5	700	2.1	105	63	14	1043	0.497644	0.303659	0.198698	0.360015	41.4505	42.0391	0.0911296	0.253127	16.3289	79.6	87.9	33.4	20.4	45.9	36.6	17.8
554	roulade	Rouladen	Rouladen	6	0.067	20	8	1	156	2	2	300	0.201	60	24	3	468	0.574368	0.285599	0.140033	0.324259	50.2647	53.1483	0.081463	0.251228	16.8604	52.5	61.6	38.8	23.9	40.3	39.9	19
555	Viennese Schnitzel	Wiener Schnitzel	Wiener Schnitzel	6	1.133	26.1	9.3	6.5	230	3	2	500	5.665	130.5	46.5	32.5	1150	0.509552	0.344921	0.145527	0.431774	43.2828	44.1401	0.120611	0.279338	15.3772	94	97.2	48.6	36.1	33.3	59.1	36.6
556	Viennese Schnitzel with potatoes	Wiener Schnitzel mit Kartoffeln	Wiener Schnitzel	10	1.483	22.1	7.8	7.8	203	3	8	300	4.449	66.3	23.4	23.4	609	0.425355	0.331625	0.24302	0.445419	27.2286	58.0718	0.0882222	0.198066	15.8186	89.1	95.6	45.8	33.3	43.5	50.3	30.2
557	roast pork	Schweinebraten	Braten	6	0.25	12	7.4	1.5	120	2	1	750	1.875	90	55.5	11.25	900	0.39325	0.325269	0.281481	0.445274	30.9095	66.4998	0.063037	0.141569	15.4083	94.8	97.5	38.3	24.5	31.9	38.3	22.9
558	asparagus with bechamel sauce	gruener Spargel mit Bechamelsosse	Spargel gruen mit Bechamelsosse	10	1.4	1.2	0.74	2	20.5	1	9	560	7.84	6.72	4.144	11.2	114.8	0.374995	0.36577	0.259235	0.286996	28.4474	64.1703	0.0964815	0.336177	15.8585	96.3	97.9	56.2	33.3	40.4	57.1	33.3
559	smoked ham / bacon	geraeucherter Schinken	Raeucherschinken	6	0	26	15	1	243	3	1	400	0	104	60	4	972	0.585916	0.241087	0.172997	0.238893	30.1469	64.1256	0.0572222	0.239531	16.16	97.2	98.6	43.9	27.6	32.3	44.7	23.2
560	fried egg	Spiegelei	Spiegelei	1	0	12.9	15.8	0.7	195	2	1	60	0	7.74	9.48	0.42	117	0.422446	0.346315	0.231239	0.425148	20.4274	33.3977	0.107519	0.252897	11.4858	97.8	100	54.1	33.6	24.8	62.7	36.5
561	cutlet	Kotelett	Kotelett	6	0	20.1	4.5	0.3	123	2	2	165	0	33.165	7.425	0.495	202.95	0.613848	0.26832	0.117832	0.322337	46.3737	48.9852	0.0943704	0.292769	16.7521	84.6	92.6	43.4	24.9	29.3	44.8	22.7
562	cutlet	Kotelett	Kotelett	6	0	22	5	0	133	2	2	300	0	66	15	0	399	0.525243	0.318063	0.156694	0.3157	39.2434	52.1554	0.0963704	0.305259	17.3887	87.7	95.7	48.2	29.6	31.2	48.8	29.8
563	steak	Steak	Steak	6	0	19	2.9	1.3	107.5	2	6	210	0	39.9	6.09	2.73	225.75	0.535616	0.272979	0.191405	0.462385	69.8551	57.5198	0.149648	0.323644	16.8043	95.7	94.5	50.8	34.7	41.4	56.4	34
564	sushi rolls	Sushirollen	Sushirollen	10	1	17.3	1.07	23.2	106.7	2	3	75	0.75	12.975	0.8025	17.4	80.025	0.415452	0.332001	0.252547	0.424274	35.4703	68.8773	0.0949444	0.223781	16.411	87.5	90.4	48	26	45.6	45.7	27.4
565	steak with backed potato and vegetables	Steak mit Backkartoffel und Gemuese	Steak mit Backkartoffel und Gemuese	10	1.957	15.3	2.3	10.5	125	2	10	290	5.675	44.37	6.67	30.45	362.5	0.421574	0.324164	0.254262	0.445126	38.0786	69.5731	0.110222	0.24762	16.3494	95.9	97.4	45.2	36.1	48.5	52.4	34.2
566	tomato and mozzarella skewer	Tomate-Mozzarella Spieß	Tomate und Mozzarella	10	0.797	4.5	3.5	2	62.6	2	21	190	1.514	8.55	6.65	3.8	118.94	0.563204	0.292823	0.143973	0.239493	30.0486	72.3233	0.0534444	0.223157	16.0455	93.7	96.9	65.3	37.6	39.8	65.2	43.8
567	tomato and mozzarella	Tomate und Mozzarella	Tomate und Mozzarella	10	0.797	6.5	5.3	2	86.7	2	13	120	0.956	7.8	6.36	2.4	104.04	0.537305	0.319653	0.143042	0.423967	47.2176	73.8674	0.0941111	0.221978	16.4203	91.4	89.6	68.7	44.7	40	75.9	51.5
568	salami, roasted ham and cheese	Salami, Schinken und Kaese	Salami, Schinken und Kaese	10	0	24.32	25.5	1.7	318.5	3	18	380	0	92.416	96.9	6.46	1210.3	0.614914	0.234743	0.150343	0.361833	48.2704	67.1595	0.131204	0.362608	16.8535	82.8	95	42.6	34.5	47.2	45.4	25.8
